# Supplementary material for: Excess death estimates from multiverse analysis in 2009–2021
Source: PubMed Central journal article supplement (PMC9516863; doi:10.1101/2022.09.21.22280219), 2022-09-23
Supplement: NIHPP2022.09.21.22280219v1-supplement-1.pdf [file NIHPP2022.09.21.22280219v1-supplement-1.pdf]

## Supplementary Table and Figure Legends

**Table S1:** Distribution of the country rank of the excess death estimates in pandemic year 2021 expressed as a percentage of the expected deaths for the 33 countries as calculated for each of the 66 different reference baseline year sets. The countries are ordered by decreasing average rank (column 2); the standard deviation of the rank is also given in column 3. (A) Shows data for 2021 alone in Table S2A; (B) Shows summed data for 2019+2020+2021 in Table S2B; ; (C) Shows summed data for 2018+2019+2020+2021 in Table S2C. Such sums are labelled by their last year so all are marked as "2021". In most cases, the most common rank for a given year over the 66 reference years is on the diagonal.

**Table S2:** Variation with year from 2009 to 2021 of the average excess death expressed as a percentage of the expected death for all 33 countries studied here. The expected death is estimated from the average mortality values of each of the 66 different reference year sets, which are all combinations of one or more consecutive years from 2009 to 2019. The average over all the reference years is shown in each table. The four tables are (A) for the sum of two adjacent years recorded at the later year (the value for 2021 is 2020+2021), (B) for individual years, (C) for the sum of three adjacent years recorded at the later year (the value for 2021 is 2019+2020+2021) and (D) for the sum of four adjacent years recorded at the later year (the value for 2021 is 2018+2019+2020+2021). The shading is calibrated by range of values in all tables considered together. Each table is sorted by descending using value in the year column "2021".

**Table S3:** Comparing the percentage excess death in the pandemic years, 2020 and 2021, with that of other pairs of years between 2009 and 2019. In 9 of the 33 countries, the pandemic years, 2020+2021, marked as "2021" in red with yellow shading, were worse than any other pair of years.

**Figure S1:** Distribution of the year rank of the of the excess death expressed as a percentage of the expected death as calculated for each of the 66 different reference baseline year sets for 33 countries and for 12 pairs of years (2009+2010 to 2020+2021). The years are ordered by decreasing average rank (in column 2); the standard deviation of the rank is given in column 3. If the ranking for all 66 calculations were the same, all counts would be on the diagonal. This is true for 16 of the 33 countries. In the other 19 countries, the largest deviations from identical ranking occur for AUT (Austria) where the three years ranked in position 2 to 3 are 2011, 2013, and 2021. The mean rank for 2013 of 4.24 is not much less than that of 2021 of 4.52. Clearly the ranking of years for a given country are largely independent of the reference years used to calculate the expected deaths.

**Figure S2** Variation with year from 2009 to 2021 of the excess death expressed as a percentage of the expected deaths as shown in Figure 1. The plots are for different projected periods (A) for individual years, (B) for the sum of three adjacent years (recorded at the latest year so the value for 2021 is 2019+2020+2021), and (C) for the sum of four adjacent years (recorded at the latest year so the value for 2021 is 2018+2019+2020+2021).

Table S1A: Country Rank Distribution of  $p\%=X/E$  for Single Years

| Location       | LOC | Rank AVE | Rank SD | Rank in Sort from Highest p% to Lowest p% For Single Years |    |    |    |    |    |    |    |    |    |    |    |    |    |    |    |    |    |    |    |    |    |    |    |    |    |    |    |    |    |    |    |    |   |   |    |   |
|----------------|-----|----------|---------|------------------------------------------------------------|----|----|----|----|----|----|----|----|----|----|----|----|----|----|----|----|----|----|----|----|----|----|----|----|----|----|----|----|----|----|----|----|---|---|----|---|
|                |     |          |         | 1                                                          | 2  | 3  | 4  | 5  | 6  | 7  | 8  | 9  | 10 | 11 | 12 | 13 | 14 | 15 | 16 | 17 | 18 | 19 | 20 | 21 | 22 | 23 | 24 | 25 | 26 | 27 | 28 | 29 | 30 | 31 | 32 | 33 |   |   |    |   |
| Slovakia       | SVK | 1.26     | 0.47    | 50                                                         | 15 | 1  |    |    |    |    |    |    |    |    |    |    |    |    |    |    |    |    |    |    |    |    |    |    |    |    |    |    |    |    |    |    |   |   |    |   |
| Poland         | POL | 2.45     | 0.56    |                                                            | 38 | 26 | 2  |    |    |    |    |    |    |    |    |    |    |    |    |    |    |    |    |    |    |    |    |    |    |    |    |    |    |    |    |    |   |   |    |   |
| United States  | USA | 2.91     | 1.47    | 16                                                         | 11 | 12 | 20 | 6  |    |    | 1  |    |    |    |    |    |    |    |    |    |    |    |    |    |    |    |    |    |    |    |    |    |    |    |    |    |   |   |    |   |
| Latvia         | LVA | 3.55     | 0.56    |                                                            | 2  | 26 | 38 |    |    |    |    |    |    |    |    |    |    |    |    |    |    |    |    |    |    |    |    |    |    |    |    |    |    |    |    |    |   |   |    |   |
| Lithuania      | LTU | 5.20     | 0.94    |                                                            |    | 1  | 6  | 48 | 5  | 3  | 2  | 1  |    |    |    |    |    |    |    |    |    |    |    |    |    |    |    |    |    |    |    |    |    |    |    |    |   |   |    |   |
| Croatia        | HRV | 7.12     | 1.27    |                                                            |    |    |    | 4  | 19 | 23 | 8  | 10 | 1  | 1  |    |    |    |    |    |    |    |    |    |    |    |    |    |    |    |    |    |    |    |    |    |    |   |   |    |   |
| Czechia        | CZE | 7.23     | 1.17    |                                                            |    |    |    | 4  | 20 | 5  | 32 | 4  | 1  |    |    |    |    |    |    |    |    |    |    |    |    |    |    |    |    |    |    |    |    |    |    |    |   |   |    |   |
| Hungary        | HUN | 7.33     | 1.36    |                                                            |    |    |    | 1  | 19 | 24 | 11 | 2  | 8  | 1  |    |    |    |    |    |    |    |    |    |    |    |    |    |    |    |    |    |    |    |    |    |    |   |   |    |   |
| Estonia        | EST | 9.47     | 1.84    |                                                            |    |    |    | 3  |    | 7  | 6  | 14 | 17 | 16 | 1  | 1  |    | 1  |    |    |    |    |    |    |    |    |    |    |    |    |    |    |    |    |    |    |   |   |    |   |
| Greece         | GRC | 9.67     | 1.01    |                                                            |    |    |    |    | 1  |    | 3  | 29 | 16 | 17 |    |    |    |    |    |    |    |    |    |    |    |    |    |    |    |    |    |    |    |    |    |    |   |   |    |   |
| Chile          | CHL | 9.94     | 1.31    |                                                            |    |    |    |    | 2  | 4  | 3  | 6  | 23 | 28 |    |    |    |    |    |    |    |    |    |    |    |    |    |    |    |    |    |    |    |    |    |    |   |   |    |   |
| Portugal       | PRT | 12.56    | 1.18    |                                                            |    |    |    |    |    |    |    |    |    | 1  | 46 | 9  | 6  | 2  |    | 1  | 1  |    |    |    |    |    |    |    |    |    |    |    |    |    |    |    |   |   |    |   |
| Austria        | AUT | 14.48    | 2.40    |                                                            |    |    |    |    |    |    |    |    |    |    | 15 | 20 | 3  | 7  | 4  | 9  | 4  | 2  | 1  |    |    |    |    |    |    |    |    |    |    |    |    |    |   |   |    |   |
| United Kingdom | GBR | 14.98    | 1.86    |                                                            |    |    |    |    |    |    |    |    |    |    | 2  | 19 | 11 | 6  | 10 | 11 | 6  |    |    |    |    |    |    |    |    |    |    |    |    |    |    |    |   |   |    |   |
| Germany        | DEU | 15.35    | 2.03    |                                                            |    |    |    |    |    |    |    |    |    |    | 1  | 6  | 22 | 13 | 10 | 5  | 3  | 2  | 1  | 1  |    |    |    |    |    |    |    |    |    |    |    |    |   |   |    |   |
| Italy          | ITA | 15.85    | 1.91    |                                                            |    |    |    |    |    |    |    |    |    |    | 2  | 1  | 2  | 4  | 22 | 16 | 10 | 3  | 4  | 1  |    |    |    |    |    |    |    |    |    |    |    |    |   |   |    |   |
| Netherlands    | NLD | 16.70    | 1.37    |                                                            |    |    |    |    |    |    |    |    |    |    |    | 2  |    | 10 | 17 | 18 | 15 | 2  |    |    |    |    |    |    |    |    |    |    |    |    |    |    |   |   |    |   |
| Slovenia       | SVN | 17.00    | 3.09    |                                                            |    |    |    |    |    |    |    |    |    |    |    | 7  | 18 | 4  | 3  | 4  | 7  | 3  | 17 | 1  |    |    |    |    |    |    |    |    |    |    |    |    |   |   |    |   |
| Canada         | CAN | 19.45    | 1.77    |                                                            |    |    |    |    |    |    |    |    |    |    |    |    | 2  | 2  | 2  | 3  | 4  | 30 | 14 | 2  |    |    |    |    |    |    |    |    |    |    |    |    |   |   |    |   |
| France         | FRA | 20.23    | 1.28    |                                                            |    |    |    |    |    |    |    |    |    |    |    |    |    |    | 1  | 1  | 6  | 17 | 27 | 7  |    |    |    |    |    |    |    |    |    |    |    |    |   |   |    |   |
| Israel         | ISR | 22.06    | 1.35    |                                                            |    |    |    |    |    |    |    |    |    |    |    |    |    | 1  | 1  |    | 2  | 3  | 30 | 26 | 1  |    |    |    |    |    |    |    |    |    |    |    |   |   |    |   |
| Spain          | ESP | 22.68    | 0.72    |                                                            |    |    |    |    |    |    |    |    |    |    |    |    |    |    |    |    | 2  | 24 | 34 | 5  | 1  |    |    |    |    |    |    |    |    |    |    |    |   |   |    |   |
| Finland        | FIN | 25.21    | 1.04    |                                                            |    |    |    |    |    |    |    |    |    |    |    |    |    |    |    |    |    |    | 1  | 13 | 34 | 10 | 5  | 3  |    |    |    |    |    |    |    |    |   |   |    |   |
| Belgium        | BEL | 25.52    | 1.22    |                                                            |    |    |    |    |    |    |    |    |    |    |    |    |    |    |    |    |    |    |    | 15 | 16 | 29 | 1  | 3  | 1  |    |    |    |    |    |    |    |   |   |    |   |
| Luxembourg     | LUX | 25.85    | 2.14    |                                                            |    |    |    |    |    |    |    |    |    |    |    |    |    |    |    |    |    |    |    | 5  | 23 | 5  | 10 | 6  | 5  | 4  |    |    |    |    |    |    |   |   |    |   |
| Switzerland    | CHE | 27.23    | 1.22    |                                                            |    |    |    |    |    |    |    |    |    |    |    |    |    |    |    |    |    |    |    |    | 1  | 5  | 6  | 29 | 20 | 1  |    | 1  |    |    |    |    |   |   |    |   |
| Denmark        | DNK | 29.00    | 1.92    |                                                            |    |    |    |    |    |    |    |    |    |    |    |    |    |    |    |    |    |    |    |    |    |    | 3  | 12 | 16 | 5  | 8  | 2  | 3  | 2  |    |    |   |   |    |   |
| Iceland        | ISL | 30.48    | 2.57    |                                                            |    |    |    |    |    |    |    |    |    |    |    |    |    |    |    |    |    |    |    | 1  |    | 1  | 1  | 1  | 3  | 6  | 12 | 11 | 4  | 15 | 1  | 3  |   |   |    |   |
| New Zealand    | NZL | 30.62    | 1.48    |                                                            |    |    |    |    |    |    |    |    |    |    |    |    |    |    |    |    |    |    |    |    |    | 1  | 1  | 2  | 24 | 22 | 7  | 1  | 3  | 1  |    |    |   |   |    |   |
| Australia      | AUS | 31.67    | 0.89    |                                                            |    |    |    |    |    |    |    |    |    |    |    |    |    |    |    |    |    |    |    |    |    |    |    | 1  |    | 1  | 17 | 41 | 5  |    |    |    |   |   |    |   |
| Norway         | NOR | 31.92    | 1.27    |                                                            |    |    |    |    |    |    |    |    |    |    |    |    |    |    |    |    |    |    |    |    |    |    |    |    |    |    |    |    |    |    |    | 14 | 8 | 9 | 34 |   |
| Sweden         | SWE | 33.95    | 0.61    |                                                            |    |    |    |    |    |    |    |    |    |    |    |    |    |    |    |    |    |    |    |    |    |    |    |    |    |    |    |    |    |    |    | 1  |   | 4 | 56 | 5 |
| South Korea    | KOR | 34.77    | 0.62    |                                                            |    |    |    |    |    |    |    |    |    |    |    |    |    |    |    |    |    |    |    |    |    |    |    |    |    |    |    |    |    |    |    | 1  | 4 | 4 | 57 |   |

medRxiv preprint doi: <https://doi.org/10.1101/2022.09.21.22280219>; this version posted September 23, 2022. The copyright holder for this preprint (which was not certified by peer review) is the author/funder, who has granted medRxiv a license to display the preprint in perpetuity. It is made available under a CC-BY 4.0 International license.

Table S1B: Country Rank Distribution of  $p\% = X/E$  Summing Three Adjacent Years

| Location       | Rank |       | Rank in Sort from Highest p% to Lowest p% Summing Three Adjacent Years |    |    |    |    |    |    |    |    |    |    |    |    |    |    |    |    |    |    |    |    |    |    |    |    |    |    |    |    |    |    |    |    |    |    |  |  |
|----------------|------|-------|------------------------------------------------------------------------|----|----|----|----|----|----|----|----|----|----|----|----|----|----|----|----|----|----|----|----|----|----|----|----|----|----|----|----|----|----|----|----|----|----|--|--|
|                | LOC  | AVE   | SD                                                                     | 1  | 2  | 3  | 4  | 5  | 6  | 7  | 8  | 9  | 10 | 11 | 12 | 13 | 14 | 15 | 16 | 17 | 18 | 19 | 20 | 21 | 22 | 23 | 24 | 25 | 26 | 27 | 28 | 29 | 30 | 31 | 32 | 33 |    |  |  |
| United States  | USA  | 1.27  | 0.54                                                                   | 50 | 15 |    | 1  |    |    |    |    |    |    |    |    |    |    |    |    |    |    |    |    |    |    |    |    |    |    |    |    |    |    |    |    |    |    |  |  |
| Poland         | POL  | 1.79  | 0.44                                                                   | 15 | 50 | 1  |    |    |    |    |    |    |    |    |    |    |    |    |    |    |    |    |    |    |    |    |    |    |    |    |    |    |    |    |    |    |    |  |  |
| Slovakia       | SVK  | 4.94  | 3.56                                                                   | 1  | 1  | 39 | 7  | 1  | 3  | 2  | 1  | 1  | 3  | 3  |    |    | 2  | 1  |    |    |    | 1  |    |    |    |    |    |    |    |    |    |    |    |    |    |    |    |  |  |
| Czechia        | CZE  | 5.58  | 2.15                                                                   |    |    |    | 34 | 8  | 6  | 4  | 6  | 5  | 1  |    | 1  | 1  |    |    |    |    |    |    |    |    |    |    |    |    |    |    |    |    |    |    |    |    |    |  |  |
| Greece         | GRC  | 6.00  | 2.95                                                                   |    |    | 11 | 8  | 20 | 7  | 8  | 3  | 2  | 1  | 1  | 2  |    | 2  |    |    |    |    | 1  |    |    |    |    |    |    |    |    |    |    |    |    |    |    |    |  |  |
| Hungary        | HUN  | 6.95  | 1.66                                                                   |    |    |    | 7  | 5  | 10 | 23 | 10 | 7  | 2  | 2  |    |    |    |    |    |    |    |    |    |    |    |    |    |    |    |    |    |    |    |    |    |    |    |  |  |
| Lithuania      | LTU  | 7.02  | 2.33                                                                   |    |    | 5  | 2  | 10 | 16 | 4  | 14 | 6  | 4  | 2  | 1  | 2  |    |    |    |    |    |    |    |    |    |    |    |    |    |    |    |    |    |    |    |    |    |  |  |
| Latvia         | LVA  | 7.85  | 2.69                                                                   |    |    | 2  |    | 8  | 11 | 12 | 13 | 6  | 6  | 4  | 1  | 1  |    | 1  |    |    |    |    |    | 1  |    |    |    |    |    |    |    |    |    |    |    |    |    |  |  |
| Croatia        | HRV  | 8.76  | 2.47                                                                   |    |    | 2  | 3  | 3  |    | 8  | 7  | 23 | 11 | 2  | 2  | 3  | 1  |    |    |    | 1  |    |    |    |    |    |    |    |    |    |    |    |    |    |    |    |    |  |  |
| Italy          | ITA  | 9.77  | 2.94                                                                   |    |    | 4  |    |    | 8  | 2  | 1  | 8  | 16 | 12 | 8  | 2  | 2  | 1  | 1  |    |    | 1  |    |    |    |    |    |    |    |    |    |    |    |    |    |    |    |  |  |
| Chile          | CHL  | 11.33 | 4.68                                                                   |    |    | 2  | 1  | 7  | 4  |    | 6  | 1  | 7  | 8  | 8  | 1  | 3  | 5  | 4  | 1  | 2  | 3  | 2  |    |    |    |    |    |    |    |    |    |    |    |    |    |    |  |  |
| United Kingdom | GBR  | 12.52 | 3.61                                                                   |    |    |    | 3  | 2  | 1  | 1  | 4  | 1  | 2  | 9  | 7  | 4  | 9  | 6  | 13 | 2  | 1  |    |    |    |    |    |    |    |    |    |    |    |    |    |    |    |    |  |  |
| Portugal       | PRT  | 13.47 | 2.40                                                                   |    |    |    |    | 1  |    |    |    | 2  | 2  | 3  | 8  | 21 | 12 | 9  | 3  | 3  |    |    |    |    | 1  |    |    |    |    |    |    |    |    |    |    |    |    |  |  |
| Slovenia       | SVN  | 14.24 | 3.80                                                                   |    |    |    |    |    |    | 1  | 2  | 4  | 11 | 15 | 2  | 5  | 8  |    |    |    | 4  | 5  | 7  |    |    |    |    |    |    |    |    |    |    |    |    |    |    |  |  |
| France         | FRA  | 14.98 | 2.98                                                                   |    |    |    |    |    | 1  |    | 1  | 1  | 3  | 6  | 9  | 7  | 14 | 8  | 4  | 4  | 4  | 4  | 3  | 1  |    |    |    |    |    |    |    |    |    |    |    |    |    |  |  |
| Austria        | AUT  | 16.92 | 3.33                                                                   |    |    |    |    |    |    |    |    | 1  | 2  |    | 10 | 8  | 6  | 7  | 2  | 4  | 8  | 15 | 1  |    |    |    |    |    |    |    |    |    |    |    |    |    |    |  |  |
| Spain          | ESP  | 17.02 | 3.64                                                                   |    |    |    | 1  |    |    |    | 1  | 2  | 1  | 2  | 2  | 5  | 2  | 8  | 16 | 7  | 4  | 3  | 3  | 3  | 2  |    |    |    |    |    |    |    |    |    |    |    |    |  |  |
| Netherlands    | NLD  | 17.91 | 2.71                                                                   |    |    |    |    |    |    |    | 1  | 1  |    | 1  | 1  | 7  | 9  | 11 | 5  | 9  | 3  | 3  | 2  |    | 1  |    |    |    |    |    |    |    |    |    |    |    |    |  |  |
| Canada         | CAN  | 17.95 | 3.21                                                                   |    |    |    |    |    |    |    |    | 2  |    | 2  | 4  | 2  | 3  | 7  | 9  | 6  | 11 | 5  | 8  | 1  | 1  |    |    |    |    |    |    |    |    |    |    |    |    |  |  |
| Germany        | DEU  | 20.38 | 2.45                                                                   |    |    |    |    |    |    |    |    |    |    | 1  |    |    |    | 4  | 2  | 5  | 9  | 18 | 5  | 5  | 3  | 4  |    |    |    |    |    |    |    |    |    |    |    |  |  |
| Estonia        | EST  | 20.71 | 5.10                                                                   |    |    |    |    |    | 1  |    |    |    | 2  | 2  | 3  | 7  | 1  |    | 3  |    |    | 4  | 9  | 14 | 5  | 7  | 3  | 1  | 1  | 2  |    |    |    |    |    |    |    |  |  |
| Belgium        | BEL  | 21.76 | 1.64                                                                   |    |    |    |    |    |    |    |    |    |    |    |    |    |    | 1  |    | 5  |    | 4  | 35 | 14 | 3  | 1  |    |    |    |    |    |    |    |    |    |    |    |  |  |
| Israel         | ISR  | 23.83 | 1.55                                                                   |    |    |    |    |    |    |    |    |    |    |    |    |    |    | 1  |    |    |    |    | 1  | 17 | 29 | 13 | 3  | 1  |    |    |    |    |    |    |    |    |    |  |  |
| Switzerland    | CHE  | 24.80 | 1.17                                                                   |    |    |    |    |    |    |    |    |    |    |    |    |    |    |    |    |    |    |    | 1  |    | 7  | 14 | 26 | 17 |    | 1  |    |    |    |    |    |    |    |  |  |
| Luxembourg     | LUX  | 25.64 | 1.73                                                                   |    |    |    |    |    |    |    |    |    |    |    |    |    |    |    |    |    |    |    | 1  | 1  |    | 1  | 9  | 7  | 33 | 6  | 5  |    |    |    |    |    |    |  |  |
| Finland        | FIN  | 27.53 | 0.82                                                                   |    |    |    |    |    |    |    |    |    |    |    |    |    |    |    |    |    |    |    |    |    |    |    |    | 2  | 38 | 16 | 1  |    |    |    |    |    |    |  |  |
| Iceland        | ISL  | 29.06 | 3.03                                                                   |    |    |    |    |    |    |    |    |    |    |    |    |    |    |    |    |    |    |    | 1  |    | 1  |    | 2  | 7  | 12 | 12 | 6  | 5  | 6  | 2  | 6  | 2  |    |  |  |
| Denmark        | DNK  | 29.92 | 2.05                                                                   |    |    |    |    |    |    |    |    |    |    |    |    |    |    |    |    |    |    |    |    |    |    |    |    |    |    | 1  | 24 | 4  | 10 | 7  | 3  | 6  |    |  |  |
| New Zealand    | NZL  | 30.38 | 1.73                                                                   |    |    |    |    |    |    |    |    |    |    |    |    |    |    |    |    |    |    |    |    |    |    |    |    |    | 1  | 2  | 1  | 26 | 11 | 5  | 2  | 2  | 3  |  |  |
| Sweden         | SWE  | 30.79 | 1.47                                                                   |    |    |    |    |    |    |    |    |    |    |    |    |    |    |    |    |    |    |    |    |    |    |    |    | 1  |    | 1  | 2  | 8  | 19 | 24 | 2  |    |    |  |  |
| Australia      | AUS  | 32.95 | 1.16                                                                   |    |    |    |    |    |    |    |    |    |    |    |    |    |    |    |    |    |    |    |    |    |    |    |    |    | 1  |    |    | 1  | 11 | 33 | 18 | 1  |    |  |  |
| Norway         | NOR  | 33.00 | 1.14                                                                   |    |    |    |    |    |    |    |    |    |    |    |    |    |    |    |    |    |    |    |    |    |    |    |    |    |    |    | 1  | 10 | 7  | 18 | 30 |    |    |  |  |
| South Korea    | KOR  | 34.83 | 0.69                                                                   |    |    |    |    |    |    |    |    |    |    |    |    |    |    |    |    |    |    |    |    |    |    |    |    |    |    |    |    | 1  |    |    | 1  | 4  | 60 |  |  |

medRxiv preprint doi: <https://doi.org/10.1101/2022.09.21.22280219>; this version posted September 23, 2022. The copyright holder for this preprint (which was not certified by peer review) is the author/funder, who has granted medRxiv a license to display the preprint in perpetuity. It is made available under a CC-BY 4.0 International license.

Table S1C: Country Rank Distribution of  $p\%=X/E$  Summing Three Adjacent Years

| LOC | Rank AVE | Rank SD | Rank in Sort from Highest p% to Lowest p% |    |    |    |    |    |    |    |    |    |    |    |    |    |    |    |    |    |    |    |    |    |    |    |    |    |    |    |    |    |    |    |    |    |    |   |    |  |
|-----|----------|---------|-------------------------------------------|----|----|----|----|----|----|----|----|----|----|----|----|----|----|----|----|----|----|----|----|----|----|----|----|----|----|----|----|----|----|----|----|----|----|---|----|--|
|     |          |         | 1                                         | 2  | 3  | 4  | 5  | 6  | 7  | 8  | 9  | 10 | 11 | 12 | 13 | 14 | 15 | 16 | 17 | 18 | 19 | 20 | 21 | 22 | 23 | 24 | 25 | 26 | 27 | 28 | 29 | 30 | 31 | 32 | 33 | 34 | 35 |   |    |  |
| USA | 1.30     | 0.55    | 48                                        | 17 | 1  |    |    |    |    |    |    |    |    |    |    |    |    |    |    |    |    |    |    |    |    |    |    |    |    |    |    |    |    |    |    |    |    |   |    |  |
| POL | 1.79     | 0.48    | 16                                        | 48 | 2  |    |    |    |    |    |    |    |    |    |    |    |    |    |    |    |    |    |    |    |    |    |    |    |    |    |    |    |    |    |    |    |    |   |    |  |
| HUN | 6.11     | 1.93    |                                           |    | 5  | 9  | 12 | 17 | 8  | 7  | 4  | 2  | 2  |    |    |    |    |    |    |    |    |    |    |    |    |    |    |    |    |    |    |    |    |    |    |    |    |   |    |  |
| LVA | 6.76     | 3.27    |                                           |    | 5  | 6  | 25 | 2  | 9  | 4  | 6  | 1  | 2  | 1  | 2  |    | 1  |    | 1  |    | 1  |    |    |    |    |    |    |    |    |    |    |    |    |    |    |    |    |   |    |  |
| CZE | 6.97     | 4.03    |                                           |    | 6  | 23 | 7  | 3  | 7  | 2  | 2  | 3  | 1  | 2  |    | 5  | 1  | 4  |    |    |    |    |    |    |    |    |    |    |    |    |    |    |    |    |    |    |    |   |    |  |
| SVK | 7.12     | 5.74    | 2                                         |    | 25 | 11 | 2  | 2  | 3  | 3  | 1  | 1  | 2  |    | 2  | 1  |    | 1  | 3  | 3  | 1  | 2  | 1  |    |    |    |    |    |    |    |    |    |    |    |    |    |    |   |    |  |
| GRC | 7.39     | 3.79    |                                           |    | 6  | 5  | 9  | 14 | 11 | 6  | 3  | 2  | 1  | 2  | 1  | 2  | 1  |    | 1  |    | 1  |    |    | 1  |    |    |    |    |    |    |    |    |    |    |    |    |    |   |    |  |
| LTU | 9.33     | 3.42    |                                           |    | 2  | 2  | 4  | 5  | 8  | 6  | 12 | 4  | 8  | 4  | 4  | 2  | 2  | 1  |    | 1  |    | 1  |    |    |    |    |    |    |    |    |    |    |    |    |    |    |    |   |    |  |
| HRV | 9.35     | 3.69    |                                           |    | 4  | 2  |    | 3  | 3  | 23 | 8  | 8  | 3  | 2  | 1  | 1  | 1  | 2  | 3  |    | 1  |    | 1  |    |    |    |    |    |    |    |    |    |    |    |    |    |    |   |    |  |
| ITA | 10.44    | 3.84    |                                           |    | 2  | 2  |    | 6  | 6  | 2  | 9  | 12 | 4  | 3  | 7  | 6  | 1  | 2  | 1  | 1  |    |    | 1  | 1  |    |    |    |    |    |    |    |    |    |    |    |    |    |   |    |  |
| GBR | 11.21    | 4.93    |                                           |    | 8  | 2  | 2  | 5  | 1  |    | 4  | 3  | 8  | 3  | 3  | 6  | 4  | 9  | 4  | 2  | 1  |    | 1  |    |    |    |    |    |    |    |    |    |    |    |    |    |    |   |    |  |
| PRT | 12.18    | 2.93    |                                           |    |    | 1  |    |    | 2  | 2  | 5  | 5  | 11 | 14 | 11 | 2  | 5  | 4  | 1  | 2  |    |    |    |    | 1  |    |    |    |    |    |    |    |    |    |    |    |    |   |    |  |
| FRA | 14.00    | 4.08    |                                           |    |    |    | 1  | 1  | 2  | 1  | 2  | 2  | 6  | 8  | 15 | 3  | 8  | 1  | 3  | 2  | 3  | 1  | 2  | 4  |    | 1  |    |    |    |    |    |    |    |    |    |    |    |   |    |  |
| CHL | 15.17    | 6.07    | 1                                         | 1  |    |    | 3  | 6  | 1  | 1  | 1  | 3  | 3  | 3  | 3  | 2  | 1  | 2  |    | 3  | 10 | 5  | 13 | 2  | 1  | 1  |    |    |    |    |    |    |    |    |    |    |    |   |    |  |
| SVN | 15.45    | 4.27    |                                           |    |    |    |    |    |    | 3  |    | 7  | 7  | 7  | 3  | 3  | 2  | 2  | 4  | 4  | 10 | 5  | 6  | 3  |    |    |    |    |    |    |    |    |    |    |    |    |    |   |    |  |
| CAN | 16.09    | 4.62    |                                           |    | 1  | 1  |    |    | 2  | 2  | 1  | 3  | 2  | 1  | 1  | 5  | 7  | 6  | 9  | 5  | 2  | 4  | 7  | 4  | 2  | 1  |    |    |    |    |    |    |    |    |    |    |    |   |    |  |
| DEU | 16.12    | 4.35    |                                           |    |    |    |    | 1  | 1  | 3  | 3  | 1  | 3  | 1  | 9  | 11 | 8  | 6  | 2  | 1  | 5  | 3  | 1  | 2  | 1  | 3  | 1  |    |    |    |    |    |    |    |    |    |    |   |    |  |
| NLD | 16.41    | 3.48    |                                           |    |    |    |    |    | 2  | 2  |    | 1  | 4  |    | 7  | 8  | 11 | 7  | 7  | 7  | 3  | 2  | 1  | 3  |    | 1  |    |    |    |    |    |    |    |    |    |    |    |   |    |  |
| ESP | 16.62    | 4.47    |                                           |    | 1  |    | 1  | 2  |    |    |    | 4  | 1  | 1  | 3  | 5  | 3  | 7  | 10 | 8  | 2  | 6  | 2  | 3  | 4  | 3  |    |    |    |    |    |    |    |    |    |    |    |   |    |  |
| AUT | 17.56    | 3.75    |                                           |    |    |    |    |    | 1  | 1  | 2  | 2  | 5  | 2  | 3  | 3  | 1  | 4  | 3  | 7  | 18 | 12 | 2  |    |    |    |    |    |    |    |    |    |    |    |    |    |    |   |    |  |
| EUM | 18.21    | 1.76    |                                           |    |    |    |    |    |    |    |    |    |    |    | 2  | 1  | 3  | 3  | 8  | 17 | 16 | 13 | 3  |    |    |    |    |    |    |    |    |    |    |    |    |    |    |   |    |  |
| EST | 21.17    | 5.75    |                                           |    |    |    | 1  |    |    |    | 2  | 1  | 1  | 2  | 4  | 3  | 1  | 1  |    | 1  | 1  | 1  |    | 10 | 14 | 6  | 5  | 3  | 4  | 1  | 1  | 1  | 1  | 2  |    |    |    |   |    |  |
| BEL | 21.65    | 1.81    |                                           |    |    |    |    |    |    |    |    |    |    |    |    |    | 1  |    | 1  | 5  | 2  | 1  | 7  | 31 | 14 | 3  | 1  |    |    |    |    |    |    |    |    |    |    |   |    |  |
| ISR | 24.21    | 1.67    |                                           |    |    |    |    |    |    |    |    |    |    |    |    |    | 1  |    |    |    |    | 2  |    | 15 | 15 | 25 | 6  | 1  | 1  |    |    |    |    |    |    |    |    |   |    |  |
| LUX | 24.83    | 2.84    |                                           |    |    |    |    |    |    |    |    |    |    | 1  |    | 1  | 1  |    |    |    |    | 2  | 2  | 3  | 18 | 5  | 17 | 9  | 5  | 2  |    |    |    |    |    |    |    |   |    |  |
| CHE | 25.08    | 1.35    |                                           |    |    |    |    |    |    |    |    |    |    |    |    |    |    |    |    |    |    | 1  |    | 6  | 12 | 21 | 22 | 1  | 2  | 1  |    |    |    |    |    |    |    |   |    |  |
| FIN | 27.48    | 0.82    |                                           |    |    |    |    |    |    |    |    |    |    |    |    |    |    |    |    |    |    |    |    |    |    | 1  | 2  | 36 | 18 | 9  |    |    |    |    |    |    |    |   |    |  |
| ISL | 28.97    | 3.85    |                                           |    |    |    |    |    |    |    |    | 1  |    |    |    |    |    |    |    |    |    |    | 1  | 1  | 2  | 3  | 8  | 7  | 8  | 7  | 4  | 5  | 6  | 4  | 6  | 3  |    |   |    |  |
| DNK | 29.47    | 1.99    |                                           |    |    |    |    |    |    |    |    |    |    |    |    |    |    |    |    |    |    |    |    |    |    | 2  | 3  | 25 | 10 | 4  | 12 | 5  |    |    |    | 5  |    |   |    |  |
| TWN | 29.89    | 2.22    |                                           |    |    |    |    |    |    |    |    |    |    |    |    |    |    |    |    |    |    |    |    |    |    | 3  | 1  | 3  | 2  | 2  | 15 | 7  | 19 | 8  | 6  |    |    |   |    |  |
| NZL | 30.17    | 1.77    |                                           |    |    |    |    |    |    |    |    |    |    |    |    |    |    |    |    |    |    |    |    |    |    |    | 1  | 1  | 1  | 2  | 14 | 30 | 6  | 6  |    |    | 2  | 3 |    |  |
| SWE | 30.74    | 1.76    |                                           |    |    |    |    |    |    |    |    |    |    |    |    |    |    |    |    |    |    |    | 1  |    |    |    |    |    | 1  | 2  | 7  | 14 | 11 | 29 | 1  |    |    |   |    |  |
| NOR | 32.58    | 1.13    |                                           |    |    |    |    |    |    |    |    |    |    |    |    |    |    |    |    |    |    |    |    |    |    |    |    |    |    |    |    |    | 4  | 10 | 8  | 32 | 12 |   |    |  |
| AUS | 33.36    | 1.14    |                                           |    |    |    |    |    |    |    |    |    |    |    |    |    |    |    |    |    |    |    |    |    |    |    |    |    | 1  |    |    |    | 1  | 1  | 4  | 21 | 37 | 1 |    |  |
| KOR | 34.80    | 0.72    |                                           |    |    |    |    |    |    |    |    |    |    |    |    |    |    |    |    |    |    |    |    |    |    |    |    |    |    |    |    |    |    |    | 1  |    | 2  | 4 | 59 |  |

medRxiv preprint doi: <https://doi.org/10.1101/2022.09.21.22280219>; this version posted September 23, 2022. The copyright holder for this preprint (which was not certified by peer review) is the author/funder, who has granted medRxiv a license to display the preprint in perpetuity. It is made available under a CC-BY 4.0 International license.

Table S2A: Relative Excess Death ( $p\%=X/E$ ) Summing Two Adjacent Years for All Countries and All Years

| Location       | LOC | 2009 | 2010  | 2011  | 2012  | 2013  | 2014  | 2015  | 2016  | 2017  | 2018  | 2019  | 2020   | 2021   |
|----------------|-----|------|-------|-------|-------|-------|-------|-------|-------|-------|-------|-------|--------|--------|
| United States  | USA | NA   | 1.34  | 0.97  | 0.53  | -0.04 | -0.64 | -0.38 | -0.04 | 0.03  | -0.19 | -1.25 | 7.10   | 16.69  |
| Poland         | POL | NA   | 7.83  | 4.62  | 3.11  | 2.21  | -1.06 | -2.19 | -2.88 | -3.79 | -2.47 | -3.26 | 3.01   | 14.16  |
| Slovakia       | SVK | NA   | 9.09  | 6.64  | 3.90  | 2.39  | -0.48 | -0.95 | -2.23 | -4.27 | -4.55 | -6.86 | -4.47  | 10.22  |
| Czechia        | CZE | NA   | 8.25  | 5.73  | 3.95  | 2.89  | -0.14 | -1.20 | -2.41 | -4.54 | -4.23 | -5.64 | -0.59  | 8.65   |
| Lithuania      | LTU | NA   | 6.44  | 4.70  | 2.18  | 1.78  | 0.12  | -0.36 | -0.04 | -2.52 | -4.57 | -7.02 | -2.48  | 8.48   |
| Croatia        | HRV | NA   | 7.89  | 4.94  | 2.69  | 0.29  | -2.08 | -0.01 | -0.89 | -2.88 | -2.90 | -5.52 | -2.54  | 6.86   |
| Latvia         | LVA | NA   | 7.74  | 4.97  | 2.35  | 1.42  | -0.56 | -1.96 | -2.85 | -2.99 | -2.77 | -4.50 | -4.53  | 6.81   |
| Chile          | CHL | NA   | 6.50  | 5.67  | 3.45  | 3.13  | 2.03  | 1.08  | -1.67 | -3.94 | -5.50 | -6.93 | -1.78  | 6.74   |
| Hungary        | HUN | NA   | 6.13  | 4.43  | 2.81  | 0.99  | -1.21 | -0.64 | -1.82 | -2.98 | -2.33 | -4.35 | -2.03  | 6.70   |
| Greece         | GRC | NA   | 5.65  | 3.83  | 4.11  | 1.56  | -2.17 | -1.34 | -1.89 | -1.97 | -2.46 | -3.28 | -0.44  | 5.64   |
| Italy          | ITA | NA   | 4.61  | 3.34  | 3.63  | 1.55  | -1.70 | -0.24 | -0.84 | -2.05 | -2.21 | -4.49 | 2.09   | 5.47   |
| Slovenia       | SVN | NA   | 7.72  | 4.89  | 4.02  | 3.07  | -0.39 | -1.70 | -2.41 | -3.27 | -3.50 | -5.49 | 0.63   | 4.69   |
| United Kingdom | GBR | NA   | 4.83  | 2.27  | 0.90  | 0.97  | -0.73 | -0.27 | -0.09 | -1.46 | -1.64 | -3.66 | 0.46   | 4.19   |
| Spain          | ESP | NA   | 4.86  | 2.56  | 2.61  | 0.88  | -1.77 | 0.14  | -0.08 | -1.61 | -1.64 | -4.54 | 1.14   | 3.60   |
| Portugal       | PRT | NA   | 6.65  | 3.47  | 1.84  | 1.80  | -1.03 | -1.97 | -0.98 | -2.09 | -2.75 | -3.44 | -0.51  | 3.52   |
| Austria        | AUT | NA   | 5.84  | 3.44  | 3.09  | 3.35  | 0.78  | -0.35 | -2.13 | -4.04 | -3.59 | -4.51 | -0.79  | 3.31   |
| Netherlands    | NLD | NA   | 4.86  | 2.99  | 2.07  | 1.55  | -1.18 | -1.43 | -0.43 | -1.44 | -2.00 | -3.48 | -0.80  | 2.51   |
| France         | FRA | NA   | 5.74  | 2.75  | 1.77  | 1.63  | -1.56 | -1.73 | -0.85 | -1.55 | -1.89 | -2.90 | 0.29   | 2.29   |
| Canada         | CAN | NA   | 5.36  | 2.78  | 1.23  | 0.18  | 0.24  | -0.26 | -1.67 | -1.60 | -1.42 | -3.08 | -0.39  | 2.27   |
| Estonia        | EST | NA   | 12.57 | 8.10  | 4.59  | 2.18  | 0.50  | -1.89 | -4.58 | -5.37 | -5.61 | -7.08 | -7.68  | 1.46   |
| Belgium        | BEL | NA   | 6.27  | 3.67  | 3.18  | 3.69  | 0.01  | -1.37 | -1.57 | -3.32 | -3.49 | -5.26 | 0.40   | 1.42   |
| Germany        | DEU | NA   | 4.76  | 2.76  | 1.24  | 1.54  | -0.66 | -1.35 | -1.35 | -2.61 | -1.27 | -1.90 | -1.70  | 1.00   |
| Switzerland    | CHE | NA   | 6.84  | 4.05  | 2.69  | 2.81  | 0.58  | 0.40  | -1.00 | -3.66 | -4.35 | -5.95 | -1.71  | -1.19  |
| Israel         | ISR | NA   | 5.61  | 4.88  | 4.31  | 2.05  | -0.52 | -0.07 | -0.82 | -2.93 | -4.50 | -5.10 | -3.22  | -1.34  |
| Luxembourg     | LUX | NA   | 8.65  | 8.06  | 5.97  | 2.64  | -1.32 | -2.93 | -4.85 | -4.36 | -2.70 | -4.77 | -3.44  | -2.74  |
| Finland        | FIN | NA   | 8.01  | 6.05  | 3.88  | 2.03  | -0.13 | -1.65 | -2.38 | -3.35 | -4.17 | -5.42 | -6.50  | -5.39  |
| Sweden         | SWE | NA   | 6.09  | 4.69  | 4.16  | 3.35  | 0.57  | -0.70 | -1.75 | -3.18 | -4.12 | -7.59 | -6.31  | -6.63  |
| Iceland        | ISL | NA   | 5.32  | 3.01  | -1.56 | 0.33  | 0.53  | -1.43 | 1.80  | 0.85  | -2.87 | -4.59 | -6.04  | -7.25  |
| Denmark        | DNK | NA   | 11.73 | 7.48  | 3.39  | 1.34  | -1.35 | -2.99 | -3.42 | -4.33 | -3.95 | -5.31 | -8.14  | -7.79  |
| New Zealand    | NZL | NA   | 5.30  | 4.63  | 4.51  | 0.43  | -0.76 | 0.04  | -2.66 | -2.69 | -2.38 | -3.93 | -7.26  | -8.98  |
| Norway         | NOR | NA   | 7.24  | 5.83  | 4.96  | 3.44  | 0.38  | -1.45 | -2.67 | -3.97 | -5.09 | -6.87 | -9.06  | -9.41  |
| Australia      | AUS | NA   | 6.98  | 5.69  | 4.70  | 2.19  | 0.75  | -0.11 | -2.16 | -2.53 | -4.63 | -7.04 | -8.84  | -9.49  |
| South Korea    | KOR | NA   | 13.61 | 10.18 | 8.04  | 5.26  | 0.90  | -1.73 | -3.60 | -6.04 | -7.33 | -9.81 | -12.65 | -13.12 |

Table S2B: Percentage Excess Death ( $p\%=X/E$ ) in a Single Year for All Countries and All Years

| Location       | LOC | 2009  | 2010  | 2011 | 2012  | 2013  | 2014  | 2015  | 2016  | 2017  | 2018  | 2019   | 2020   | 2021   |
|----------------|-----|-------|-------|------|-------|-------|-------|-------|-------|-------|-------|--------|--------|--------|
| Slovakia       | SVK | 9.31  | 8.98  | 4.43 | 3.61  | 1.30  | -2.12 | 0.29  | -4.59 | -4.02 | -4.98 | -8.61  | -0.32  | 20.69  |
| Poland         | POL | 9.39  | 5.92  | 2.97 | 2.88  | 1.20  | -3.60 | -1.15 | -4.90 | -3.02 | -2.25 | -4.57  | 10.18  | 17.77  |
| United States  | USA | 1.75  | 0.97  | 1.00 | 0.08  | -0.13 | -1.11 | 0.37  | -0.43 | 0.50  | -0.85 | -1.62  | 15.80  | 17.60  |
| Latvia         | LVA | 7.55  | 7.85  | 2.03 | 2.60  | 0.17  | -1.36 | -2.63 | -3.15 | -2.91 | -2.70 | -6.37  | -2.75  | 16.31  |
| Lithuania      | LTU | 6.52  | 6.63  | 3.05 | 1.59  | 2.23  | -1.71 | 1.24  | -1.06 | -3.72 | -5.17 | -8.61  | 3.89   | 13.33  |
| Hungary        | HUN | 6.57  | 5.67  | 3.18 | 2.43  | -0.46 | -1.97 | 0.67  | -4.29 | -1.70 | -2.97 | -5.71  | 1.59   | 11.80  |
| Croatia        | HRV | 8.77  | 6.97  | 2.89 | 2.43  | -1.89 | -2.33 | 2.23  | -4.02 | -1.80 | -4.04 | -7.03  | 1.86   | 11.80  |
| Czechia        | CZE | 9.58  | 6.84  | 4.54 | 3.27  | 2.41  | -2.73 | 0.21  | -5.07 | -4.12 | -4.43 | -6.92  | 5.55   | 11.62  |
| Chile          | CHL | 4.67  | 8.70  | 3.15 | 4.18  | 2.53  | 1.95  | 0.63  | -3.45 | -4.04 | -6.57 | -6.94  | 3.58   | 10.15  |
| Greece         | GRC | 6.66  | 4.32  | 3.01 | 4.84  | -1.98 | -2.68 | -0.36 | -3.71 | -0.55 | -4.64 | -2.24  | 1.04   | 9.91   |
| Estonia        | EST | 14.10 | 10.72 | 5.17 | 3.68  | 0.38  | 0.30  | -4.35 | -5.12 | -5.93 | -5.61 | -8.83  | -6.84  | 9.41   |
| Portugal       | PRT | 6.97  | 6.22  | 0.67 | 2.87  | 0.63  | -2.77 | -1.28 | -0.79 | -3.46 | -2.15 | -4.80  | 3.61   | 3.33   |
| Austria        | AUT | 6.89  | 4.77  | 2.09 | 4.02  | 2.65  | -1.09 | 0.32  | -4.57 | -3.55 | -3.68 | -5.38  | 3.73   | 2.85   |
| United Kingdom | GBR | 5.65  | 4.11  | 0.54 | 1.33  | 0.69  | -2.06 | 1.59  | -1.63 | -1.22 | -1.98 | -5.26  | 6.16   | 2.30   |
| Italy          | ITA | 6.15  | 3.12  | 3.54 | 3.71  | -0.57 | -2.82 | 2.27  | -3.91 | -0.23 | -4.18 | -4.80  | 8.90   | 2.07   |
| Germany        | DEU | 5.31  | 4.08  | 1.33 | 1.02  | 1.94  | -3.30 | 0.45  | -3.21 | -2.13 | -0.52 | -3.36  | -0.17  | 2.06   |
| Slovenia       | SVN | 9.41  | 5.96  | 3.89 | 4.03  | 2.02  | -2.84 | -0.70 | -4.17 | -2.49 | -4.59 | -6.47  | 7.51   | 1.82   |
| Netherlands    | NLD | 5.37  | 4.43  | 1.67 | 2.54  | 0.65  | -2.89 | 0.06  | -0.84 | -1.96 | -1.97 | -4.90  | 3.28   | 1.81   |
| Canada         | CAN | 7.23  | 3.47  | 1.98 | 0.38  | -0.13 | 0.48  | -1.13 | -2.29 | -1.03 | -1.90 | -4.33  | 3.47   | 1.01   |
| France         | FRA | 6.58  | 4.70  | 0.63 | 2.67  | 0.41  | -3.68 | -0.03 | -1.85 | -1.45 | -2.52 | -3.47  | 3.81   | 0.61   |
| Israel         | ISR | 6.15  | 5.08  | 4.67 | 4.09  | 0.05  | -1.09 | 0.90  | -2.51 | -3.35 | -5.64 | -4.59  | -1.90  | -0.82  |
| Spain          | ESP | 6.67  | 3.24  | 2.02 | 3.32  | -1.37 | -2.04 | 2.40  | -2.40 | -0.73 | -2.41 | -6.51  | 8.78   | -1.44  |
| Finland        | FIN | 8.13  | 7.94  | 4.26 | 3.56  | 0.59  | -0.79 | -2.46 | -2.26 | -4.38 | -3.93 | -6.85  | -6.12  | -4.63  |
| Belgium        | BEL | 7.25  | 5.39  | 2.07 | 4.34  | 3.12  | -2.97 | 0.29  | -3.32 | -3.25 | -3.66 | -6.76  | 7.57   | -4.67  |
| Luxembourg     | LUX | 8.05  | 9.29  | 6.93 | 5.10  | 0.31  | -2.84 | -3.07 | -6.52 | -2.20 | -3.15 | -6.31  | -0.57  | -4.78  |
| Switzerland    | CHE | 7.85  | 5.88  | 2.29 | 3.10  | 2.55  | -1.32 | 2.11  | -4.01 | -3.30 | -5.35 | -6.51  | 3.01   | -5.33  |
| Denmark        | DNK | 12.91 | 10.22 | 4.44 | 2.02  | 0.34  | -3.33 | -2.98 | -4.17 | -4.94 | -3.28 | -7.60  | -8.95  | -6.93  |
| Iceland        | ISL | 5.39  | 5.36  | 0.83 | -3.77 | 4.45  | -3.20 | 0.40  | 3.26  | -1.41 | -4.19 | -5.04  | -6.93  | -7.48  |
| New Zealand    | NZL | 7.50  | 2.99  | 6.03 | 2.85  | -2.11 | 0.37  | -0.45 | -4.97 | -0.64 | -4.25 | -3.89  | -10.68 | -7.48  |
| Australia      | AUS | 8.17  | 5.97  | 5.53 | 4.00  | 0.53  | 1.06  | -1.12 | -3.07 | -1.92 | -7.17 | -6.83  | -10.70 | -8.22  |
| Norway         | NOR | 7.74  | 6.87  | 4.94 | 5.11  | 1.92  | -1.01 | -1.76 | -3.44 | -4.37 | -5.69 | -7.91  | -10.07 | -8.65  |
| Sweden         | SWE | 6.66  | 6.01  | 3.86 | 4.93  | 2.26  | -0.64 | -0.32 | -2.72 | -3.19 | -4.61 | -10.10 | -2.16  | -10.61 |
| South Korea    | KOR | 15.53 | 12.16 | 8.59 | 7.82  | 3.10  | -0.92 | -2.25 | -4.65 | -7.11 | -7.31 | -11.99 | -13.07 | -12.96 |

medRxiv preprint doi: <https://doi.org/10.1101/2022.09.21.22280219>; this version posted September 23, 2022. The copyright holder for this preprint (which was not certified by peer review) is the author/funder, who has granted medRxiv a license to display the preprint in perpetuity. It is made available under a CC-BY 4.0 International license.

Table S2C: Relative Excess Death ( $p\% = X/E$ ) Summing Three Adjacent Years for All Countries and All Years

| Location       | LOC | 2009 | 2010 | 2011  | 2012 | 2013 | 2014  | 2015  | 2016  | 2017  | 2018  | 2019  | 2020   | 2021   |
|----------------|-----|------|------|-------|------|------|-------|-------|-------|-------|-------|-------|--------|--------|
| United States  | USA | NA   | NA   | 1.21  | 0.66 | 0.29 | -0.41 | -0.30 | -0.40 | 0.13  | -0.28 | -0.69 | 4.47   | 10.61  |
| Poland         | POL | NA   | NA   | 6.45  | 4.29 | 2.72 | 0.48  | -0.84 | -2.87 | -2.69 | -3.03 | -2.95 | 1.51   | 8.22   |
| Slovakia       | SVK | NA   | NA   | 7.59  | 5.69 | 3.13 | 0.93  | -0.15 | -2.12 | -2.77 | -4.50 | -5.87 | -4.58  | 4.12   |
| Czechia        | CZE | NA   | NA   | 7.09  | 4.99 | 3.52 | 1.07  | 0.07  | -2.43 | -2.91 | -4.42 | -5.06 | -1.76  | 3.63   |
| Greece         | GRC | NA   | NA   | 4.84  | 4.28 | 2.12 | 0.20  | -1.46 | -2.06 | -1.35 | -2.79 | -2.30 | -1.74  | 3.13   |
| Lithuania      | LTU | NA   | NA   | 5.24  | 3.59 | 2.14 | 0.54  | 0.43  | -0.66 | -1.33 | -3.46 | -5.98 | -3.43  | 2.72   |
| Hungary        | HUN | NA   | NA   | 5.23  | 3.85 | 1.80 | 0.08  | -0.48 | -1.78 | -1.69 | -2.89 | -3.39 | -2.26  | 2.68   |
| Latvia         | LVA | NA   | NA   | 6.04  | 4.38 | 1.83 | 0.69  | -1.06 | -2.16 | -2.67 | -2.65 | -3.77 | -3.72  | 2.62   |
| Croatia        | HRV | NA   | NA   | 6.32  | 4.21 | 1.25 | -0.49 | -0.52 | -1.26 | -1.09 | -3.17 | -4.19 | -2.93  | 2.32   |
| Chile          | CHL | NA   | NA   | 5.18  | 4.99 | 2.98 | 2.57  | 1.40  | -0.65 | -2.64 | -4.98 | -6.13 | -3.46  | 2.17   |
| Italy          | ITA | NA   | NA   | 4.18  | 3.41 | 2.14 | 0.01  | -0.40 | -1.54 | -0.69 | -2.82 | -3.14 | -0.02  | 2.03   |
| United Kingdom | GBR | NA   | NA   | 3.40  | 1.99 | 0.87 | -0.02 | 0.08  | -0.70 | -0.44 | -1.60 | -2.83 | -0.31  | 1.11   |
| Slovenia       | SVN | NA   | NA   | 6.46  | 4.70 | 3.38 | 1.09  | -0.45 | -2.50 | -2.39 | -3.68 | -4.47 | -1.04  | 1.07   |
| Portugal       | PRT | NA   | NA   | 4.79  | 3.45 | 1.60 | 0.42  | -0.95 | -1.40 | -1.66 | -1.95 | -3.29 | -0.89  | 0.94   |
| France         | FRA | NA   | NA   | 4.15  | 2.88 | 1.45 | -0.03 | -0.89 | -1.63 | -0.92 | -1.75 | -2.29 | -0.50  | 0.53   |
| Austria        | AUT | NA   | NA   | 4.61  | 3.68 | 2.97 | 1.88  | 0.66  | -1.76 | -2.58 | -3.88 | -4.16 | -1.71  | 0.46   |
| Spain          | ESP | NA   | NA   | 3.85  | 2.78 | 1.22 | -0.15 | -0.39 | -0.76 | -0.34 | -1.92 | -3.33 | -0.06  | 0.24   |
| Canada         | CAN | NA   | NA   | 4.28  | 2.04 | 0.85 | 0.37  | -0.14 | -0.88 | -1.37 | -1.63 | -2.34 | -0.81  | 0.16   |
| Netherlands    | NLD | NA   | NA   | 3.81  | 2.88 | 1.63 | 0.08  | -0.71 | -1.19 | -0.91 | -1.58 | -2.95 | -1.14  | 0.13   |
| Germany        | DEU | NA   | NA   | 3.77  | 2.34 | 1.65 | 0.06  | -0.12 | -1.82 | -1.45 | -1.75 | -1.82 | -1.16  | -0.28  |
| Belgium        | BEL | NA   | NA   | 4.84  | 3.91 | 3.17 | 1.43  | 0.11  | -2.02 | -2.13 | -3.43 | -4.59 | -0.93  | -1.28  |
| Estonia        | EST | NA   | NA   | 10.37 | 6.89 | 3.44 | 1.82  | -0.88 | -2.72 | -4.77 | -5.19 | -6.44 | -6.74  | -1.69  |
| Israel         | ISR | NA   | NA   | 5.21  | 4.53 | 2.82 | 0.90  | -0.10 | -0.97 | -1.75 | -3.91 | -4.59 | -4.07  | -2.45  |
| Switzerland    | CHE | NA   | NA   | 5.25  | 3.70 | 2.61 | 1.37  | 1.07  | -1.13 | -1.81 | -4.26 | -5.11 | -2.92  | -2.96  |
| Luxembourg     | LUX | NA   | NA   | 8.11  | 7.24 | 4.20 | 0.92  | -1.76 | -4.04 | -3.78 | -3.79 | -3.78 | -3.20  | -3.77  |
| Finland        | FIN | NA   | NA   | 6.83  | 5.30 | 2.85 | 1.16  | -0.84 | -1.77 | -2.97 | -3.46 | -5.00 | -5.58  | -5.78  |
| Iceland        | ISL | NA   | NA   | 3.77  | 0.68 | 0.47 | -0.89 | 0.47  | 0.15  | 0.67  | -0.89 | -3.63 | -5.46  | -6.55  |
| New Zealand    | NZL | NA   | NA   | 5.56  | 4.03 | 2.26 | 0.41  | -0.65 | -1.67 | -1.96 | -3.21 | -2.89 | -6.27  | -7.33  |
| Denmark        | DNK | NA   | NA   | 9.65  | 6.01 | 2.73 | 0.13  | -1.54 | -3.03 | -3.58 | -3.67 | -4.85 | -6.22  | -7.40  |
| Sweden         | SWE | NA   | NA   | 5.18  | 4.61 | 3.37 | 1.85  | 0.12  | -1.54 | -2.39 | -3.81 | -6.29 | -5.89  | -7.90  |
| Australia      | AUS | NA   | NA   | 6.31  | 4.95 | 3.11 | 1.65  | -0.05 | -1.27 | -2.21 | -4.25 | -5.51 | -8.42  | -8.75  |
| Norway         | NOR | NA   | NA   | 6.42  | 5.55 | 3.90 | 1.91  | -0.37 | -2.15 | -3.27 | -4.58 | -6.08 | -7.99  | -8.95  |
| South Korea    | KOR | NA   | NA   | 11.78 | 9.30 | 6.26 | 3.05  | -0.25 | -2.80 | -4.88 | -6.53 | -9.00 | -10.99 | -12.80 |



Table S2D: Relative Excess Death (p%=X/E) Summing Four Adjacent Years for All Countries and All Years

| Location       | LOC | 2009 | 2010 | 2011 | 2012  | 2013 | 2014  | 2015  | 2016  | 2017  | 2018  | 2019  | 2020   | 2021   |
|----------------|-----|------|------|------|-------|------|-------|-------|-------|-------|-------|-------|--------|--------|
| Australia      | AUS | NA   | NA   | NA   | 5.65  | 3.75 | 2.53  | 0.87  | -0.88 | -1.48 | -3.54 | -4.96 | -6.90  | -8.41  |
| Austria        | AUT | NA   | NA   | NA   | 4.43  | 3.39 | 1.91  | 1.45  | -0.72 | -2.24 | -2.88 | -4.29 | -2.18  | -0.58  |
| Belgium        | BEL | NA   | NA   | NA   | 4.67  | 3.67 | 1.55  | 1.10  | -0.81 | -2.37 | -2.56 | -4.32 | -1.53  | -1.90  |
| Canada         | CAN | NA   | NA   | NA   | 3.37  | 1.58 | 0.85  | 0.09  | -0.60 | -0.82 | -1.41 | -2.24 | -0.77  | -0.26  |
| Switzerland    | CHE | NA   | NA   | NA   | 4.62  | 3.33 | 1.52  | 1.49  | -0.31 | -1.76 | -2.79 | -4.91 | -3.08  | -3.60  |
| Chile          | CHL | NA   | NA   | NA   | 4.70  | 4.15 | 2.51  | 1.87  | -0.07 | -1.73 | -3.85 | -5.67 | -3.76  | -0.08  |
| Czechia        | CZE | NA   | NA   | NA   | 6.19  | 4.41 | 2.00  | 0.93  | -1.17 | -2.78 | -3.22 | -4.98 | -2.26  | 1.74   |
| Germany        | DEU | NA   | NA   | NA   | 3.20  | 2.37 | 0.49  | 0.28  | -0.79 | -1.78 | -1.10 | -2.04 | -1.28  | -0.23  |
| Denmark        | DNK | NA   | NA   | NA   | 8.02  | 4.88 | 1.49  | -0.36 | -1.91 | -3.22 | -3.21 | -4.40 | -5.63  | -6.13  |
| Spain          | ESP | NA   | NA   | NA   | 3.71  | 1.71 | 0.38  | 0.51  | -0.91 | -0.75 | -0.87 | -3.11 | -0.22  | -0.41  |
| Estonia        | EST | NA   | NA   | NA   | 8.87  | 5.43 | 2.84  | 0.44  | -1.76 | -3.34 | -4.79 | -5.92 | -6.35  | -2.46  |
| Finland        | FIN | NA   | NA   | NA   | 6.05  | 4.14 | 1.97  | 0.28  | -1.14 | -2.38 | -3.16 | -4.27 | -5.23  | -5.28  |
| France         | FRA | NA   | NA   | NA   | 3.88  | 2.35 | 0.23  | 0.07  | -1.04 | -1.49 | -1.23 | -2.09 | -0.64  | -0.13  |
| United Kingdom | GBR | NA   | NA   | NA   | 2.87  | 1.66 | 0.12  | 0.39  | -0.35 | -0.83 | -0.83 | -2.53 | -0.53  | 0.36   |
| Greece         | GRC | NA   | NA   | NA   | 5.01  | 2.81 | 1.03  | 0.21  | -1.89 | -1.53 | -2.05 | -2.50 | -1.31  | 1.36   |
| Croatia        | HRV | NA   | NA   | NA   | 5.46  | 2.78 | 0.46  | 0.33  | -1.28 | -1.27 | -1.72 | -4.03 | -2.54  | 0.89   |
| Hungary        | HUN | NA   | NA   | NA   | 4.65  | 2.88 | 0.97  | 0.36  | -1.33 | -1.61 | -1.90 | -3.49 | -2.00  | 1.40   |
| Iceland        | ISL | NA   | NA   | NA   | 1.77  | 1.60 | -0.53 | -0.61 | 1.14  | -0.30 | -0.63 | -2.01 | -4.53  | -6.02  |
| Israel         | ISR | NA   | NA   | NA   | 4.87  | 3.31 | 1.75  | 0.86  | -0.77 | -1.63 | -2.79 | -4.12 | -3.93  | -3.25  |
| Italy          | ITA | NA   | NA   | NA   | 4.10  | 2.42 | 0.91  | 0.64  | -1.26 | -1.16 | -1.54 | -3.28 | -0.03  | 0.55   |
| South Korea    | KOR | NA   | NA   | NA   | 10.64 | 7.57 | 4.27  | 1.57  | -1.49 | -4.01 | -5.59 | -8.04 | -10.14 | -11.57 |
| Lithuania      | LTU | NA   | NA   | NA   | 4.23  | 3.16 | 1.07  | 0.63  | -0.03 | -1.51 | -2.38 | -4.84 | -3.58  | 0.68   |
| Luxembourg     | LUX | NA   | NA   | NA   | 7.71  | 5.69 | 2.61  | 0.12  | -2.76 | -3.32 | -3.38 | -4.21 | -2.66  | -3.40  |
| Latvia         | LVA | NA   | NA   | NA   | 5.34  | 3.49 | 1.19  | 0.01  | -1.42 | -2.19 | -2.52 | -3.45 | -3.36  | 1.45   |
| Netherlands    | NLD | NA   | NA   | NA   | 3.51  | 2.33 | 0.48  | 0.10  | -0.72 | -1.37 | -1.16 | -2.42 | -1.32  | -0.36  |
| Norway         | NOR | NA   | NA   | NA   | 6.06  | 4.60 | 2.63  | 0.95  | -1.18 | -2.74 | -3.91 | -5.46 | -7.13  | -8.18  |
| New Zealand    | NZL | NA   | NA   | NA   | 5.02  | 2.60 | 1.92  | 0.34  | -1.63 | -1.26 | -2.41 | -3.25 | -4.78  | -6.46  |
| Poland         | POL | NA   | NA   | NA   | 5.77  | 3.73 | 1.31  | 0.28  | -1.67 | -2.69 | -2.36 | -3.22 | 0.61   | 5.86   |
| Portugal       | PRT | NA   | NA   | NA   | 4.37  | 2.79 | 0.55  | 0.05  | -0.84 | -1.87 | -1.72 | -2.62 | -1.46  | 0.24   |
| Slovakia       | SVK | NA   | NA   | NA   | 6.64  | 4.63 | 1.85  | 0.83  | -1.23 | -2.55 | -3.28 | -5.50 | -4.38  | 1.96   |
| Slovenia       | SVN | NA   | NA   | NA   | 5.91  | 4.08 | 1.84  | 0.70  | -1.34 | -2.43 | -2.89 | -4.33 | -1.32  | -0.24  |
| Sweden         | SWE | NA   | NA   | NA   | 4.98  | 3.88 | 2.21  | 1.17  | -0.74 | -2.09 | -3.08 | -5.55 | -5.36  | -7.22  |
| United States  | USA | NA   | NA   | NA   | 0.96  | 0.50 | -0.03 | -0.17 | -0.30 | -0.14 | -0.09 | -0.59 | 3.54   | 7.82   |

medRxiv preprint doi: <https://doi.org/10.1101/2022.09.21.22280219>; this version posted September 23, 2022. The copyright holder for this preprint (which was not certified by peer review) is the author/funder, who has granted medRxiv a license to display the preprint in perpetuity. It is made available under a CC-BY 4.0 International license.

Table S3: Three Worst Pairs of Years, Plus 2021 If Not Already Included

| Location       | LOC | Year1 | Year2 | Year3 | Year4 | p1%  | p2% | p3% | p4%   | pd1% | pd2% | pd3% | pd4% |
|----------------|-----|-------|-------|-------|-------|------|-----|-----|-------|------|------|------|------|
| Australia      | AUS | 2010  | 2011  | 2012  | 2021  | 6.6  | 5.4 | 4.4 | -9.7  | 16.4 | 15.1 | 14.1 | 0.00 |
| Austria        | AUT | 2010  | 2011  | 2013  | 2021  | 5.7  | 3.3 | 3.2 | 3.2   | 2.5  | 0.1  | 0.0  | 0.00 |
| Belgium        | BEL | 2010  | 2013  | 2011  | 2021  | 6.3  | 3.7 | 3.7 | 1.4   | 4.9  | 2.3  | 2.3  | 0.00 |
| Canada         | CAN | 2010  | 2011  | 2021  | NA    | 5.3  | 2.7 | 2.2 |       | 3.1  | 0.5  | 0.0  |      |
| Switzerland    | CHE | 2010  | 2011  | 2013  | 2021  | 6.7  | 3.9 | 2.7 | -1.3  | 8.0  | 5.2  | 4.0  | 0.00 |
| Chile          | CHL | 2021  | 2010  | 2011  | NA    | 6.5  | 6.1 | 5.3 |       | 1.2  | 0.8  | 0.0  |      |
| Czechia        | CZE | 2021  | 2010  | 2011  | NA    | 8.7  | 8.3 | 5.8 |       | 2.9  | 2.5  | 0.0  |      |
| Germany        | DEU | 2010  | 2011  | 2013  | 2021  | 4.8  | 2.8 | 1.5 | 1.0   | 3.8  | 1.8  | 0.5  | 0.00 |
| Denmark        | DNK | 2010  | 2011  | 2012  | 2021  | 12.0 | 7.7 | 3.6 | -7.6  | 19.6 | 15.3 | 11.2 | 0.00 |
| Spain          | ESP | 2010  | 2021  | 2012  | NA    | 4.8  | 3.6 | 2.6 |       | 2.3  | 1.0  | 0.0  |      |
| Estonia        | EST | 2010  | 2011  | 2012  | 2021  | 12.8 | 8.3 | 4.8 | 1.7   | 11.2 | 6.7  | 3.2  | 0.00 |
| Finland        | FIN | 2010  | 2011  | 2012  | 2021  | 8.1  | 6.1 | 4.0 | -5.3  | 13.4 | 11.5 | 9.3  | 0.00 |
| France         | FRA | 2010  | 2011  | 2021  | NA    | 5.9  | 2.9 | 2.4 |       | 3.5  | 0.5  | 0.0  |      |
| United Kingdom | GBR | 2010  | 2021  | 2011  | NA    | 4.8  | 4.2 | 2.2 |       | 2.6  | 1.9  | 0.0  |      |
| Greece         | GRC | 2021  | 2010  | 2012  | NA    | 5.6  | 5.6 | 4.0 |       | 1.6  | 1.5  | 0.0  |      |
| Croatia        | HRV | 2010  | 2021  | 2011  | NA    | 8.1  | 7.0 | 5.1 |       | 3.0  | 1.9  | 0.0  |      |
| Hungary        | HUN | 2021  | 2010  | 2011  | NA    | 6.8  | 6.3 | 4.6 |       | 2.3  | 1.7  | 0.0  |      |
| Iceland        | ISL | 2010  | 2011  | 2016  | 2021  | 5.2  | 2.9 | 1.7 | -7.3  | 12.5 | 10.2 | 9.0  | 0.00 |
| Israel         | ISR | 2010  | 2011  | 2012  | 2021  | 5.4  | 4.6 | 4.1 | -1.5  | 6.9  | 6.2  | 5.7  | 0.00 |
| Italy          | ITA | 2021  | 2010  | 2012  | NA    | 5.4  | 4.6 | 3.6 |       | 1.8  | 1.0  | 0.0  |      |
| South Korea    | KOR | 2010  | 2011  | 2012  | 2021  | 13.1 | 9.7 | 7.5 | -13.5 | 26.5 | 23.1 | 21.0 | 0.00 |
| Lithuania      | LTU | 2021  | 2010  | 2011  | NA    | 8.6  | 6.6 | 4.8 |       | 3.8  | 1.7  | 0.0  |      |
| Luxembourg     | LUX | 2010  | 2011  | 2012  | 2021  | 8.8  | 8.2 | 6.1 | -2.6  | 11.4 | 10.8 | 8.7  | 0.00 |
| Latvia         | LVA | 2010  | 2021  | 2011  | NA    | 8.0  | 7.0 | 5.2 |       | 2.8  | 1.8  | 0.0  |      |
| Netherlands    | NLD | 2010  | 2011  | 2021  | NA    | 4.9  | 3.0 | 2.5 |       | 2.4  | 0.5  | 0.0  |      |
| Norway         | NOR | 2010  | 2011  | 2012  | 2021  | 7.2  | 5.8 | 4.9 | -9.4  | 16.6 | 15.2 | 14.4 | 0.00 |
| New Zealand    | NZL | 2010  | 2011  | 2012  | 2021  | 5.2  | 4.5 | 4.4 | -9.1  | 14.2 | 13.6 | 13.5 | 0.00 |
| Poland         | POL | 2021  | 2010  | 2011  | NA    | 14.2 | 7.9 | 4.7 |       | 9.5  | 3.2  | 0.0  |      |
| Portugal       | PRT | 2010  | 2021  | 2011  | NA    | 6.8  | 3.6 | 3.6 |       | 3.2  | 0.0  | 0.0  |      |
| Slovakia       | SVK | 2021  | 2010  | 2011  | NA    | 10.2 | 9.1 | 6.6 |       | 3.6  | 2.5  | 0.0  |      |
| Slovenia       | SVN | 2010  | 2011  | 2021  | NA    | 7.7  | 5.0 | 4.7 |       | 3.0  | 0.3  | 0.0  |      |
| Sweden         | SWE | 2010  | 2011  | 2012  | 2021  | 6.0  | 4.6 | 4.1 | -6.7  | 12.7 | 11.3 | 10.8 | 0.00 |
| United States  | USA | 2021  | 2010  | 2011  | NA    | 16.6 | 1.3 | 0.9 |       | 15.7 | 0.4  | 0.0  |      |

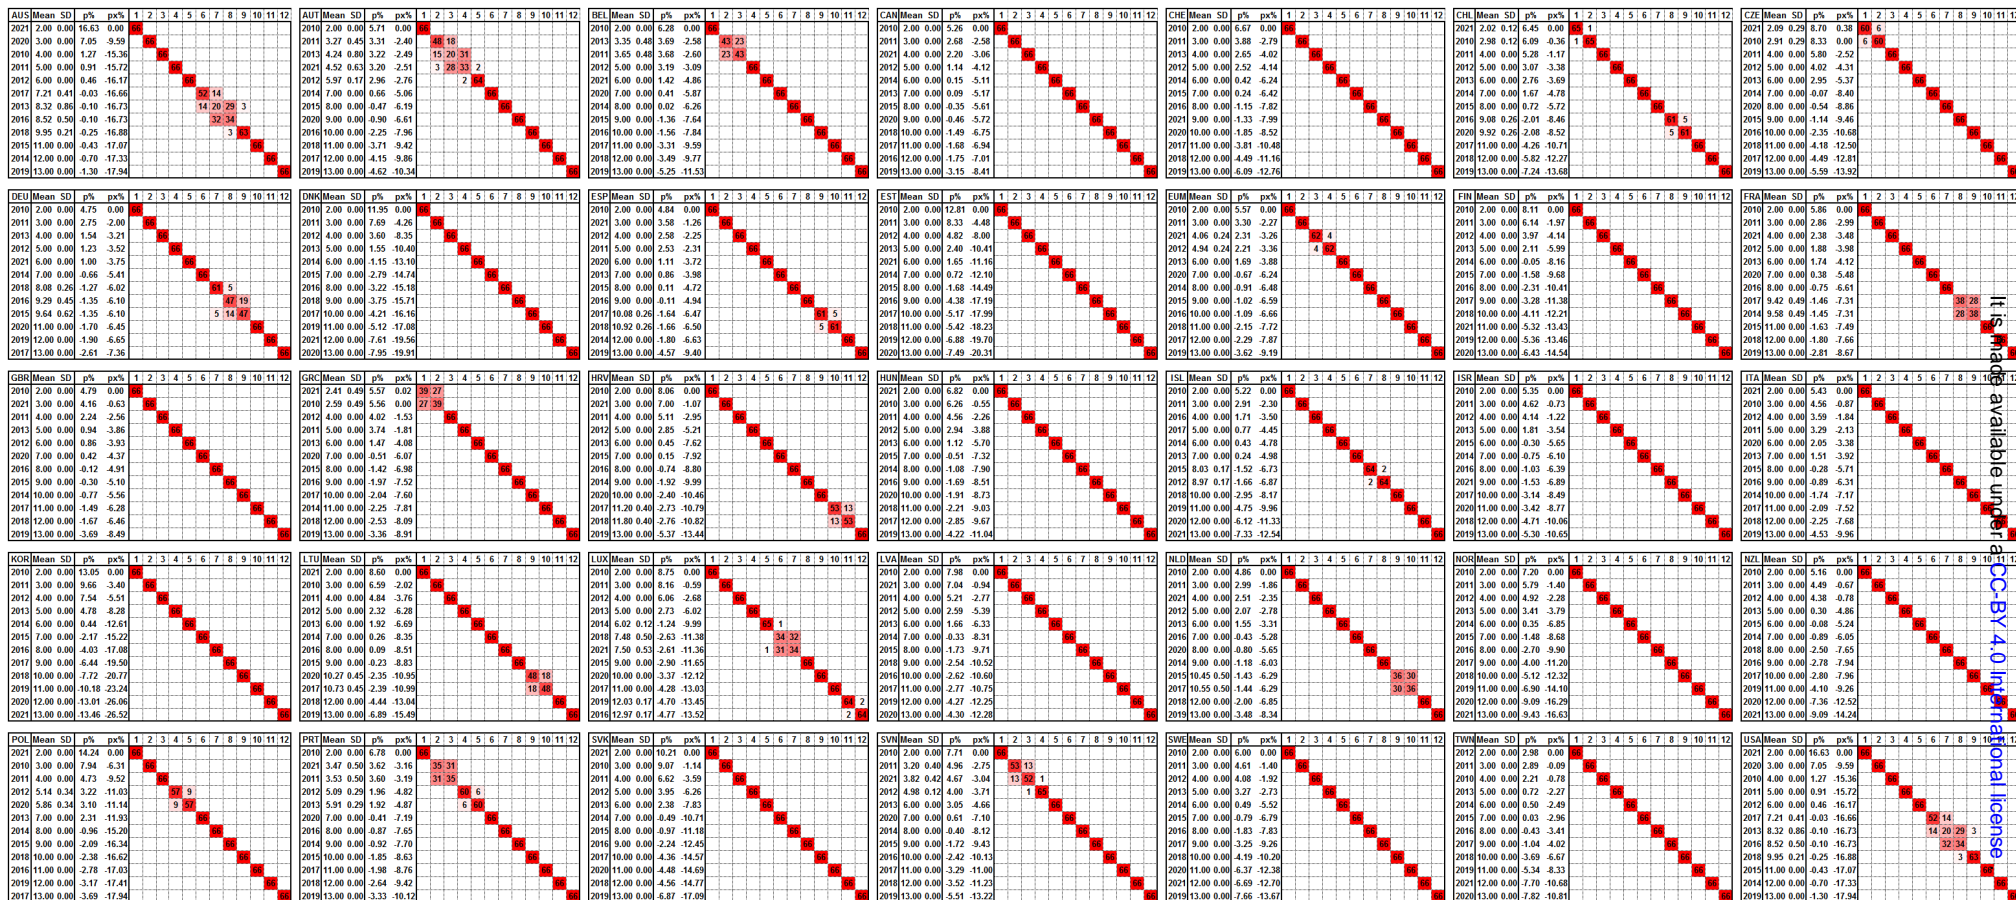

Figure S1

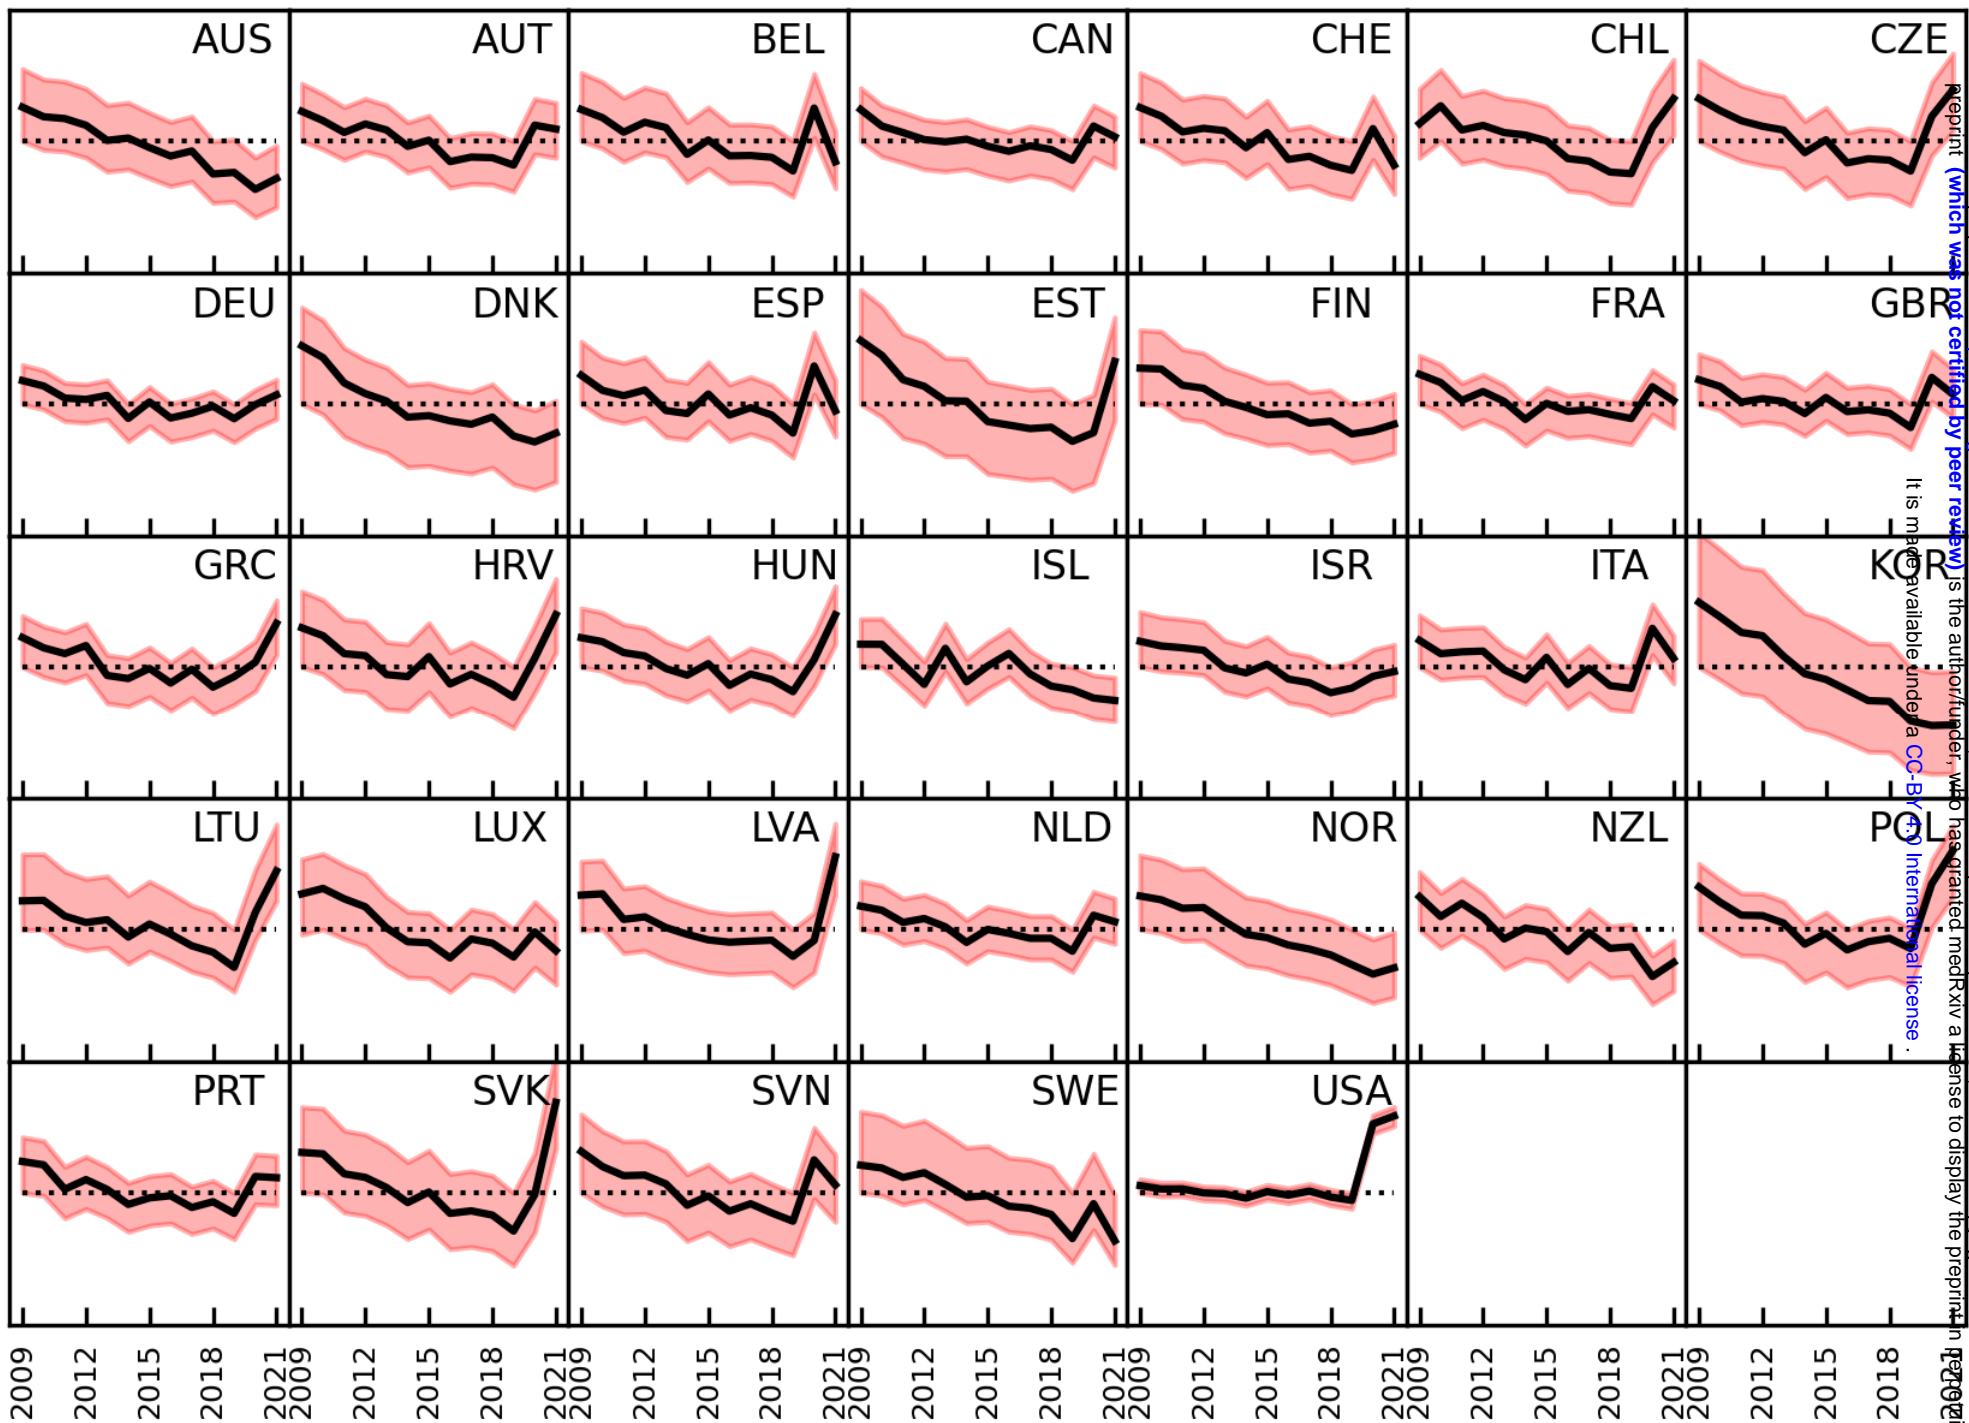

Year Between 2009 and 2021

Figure S2A

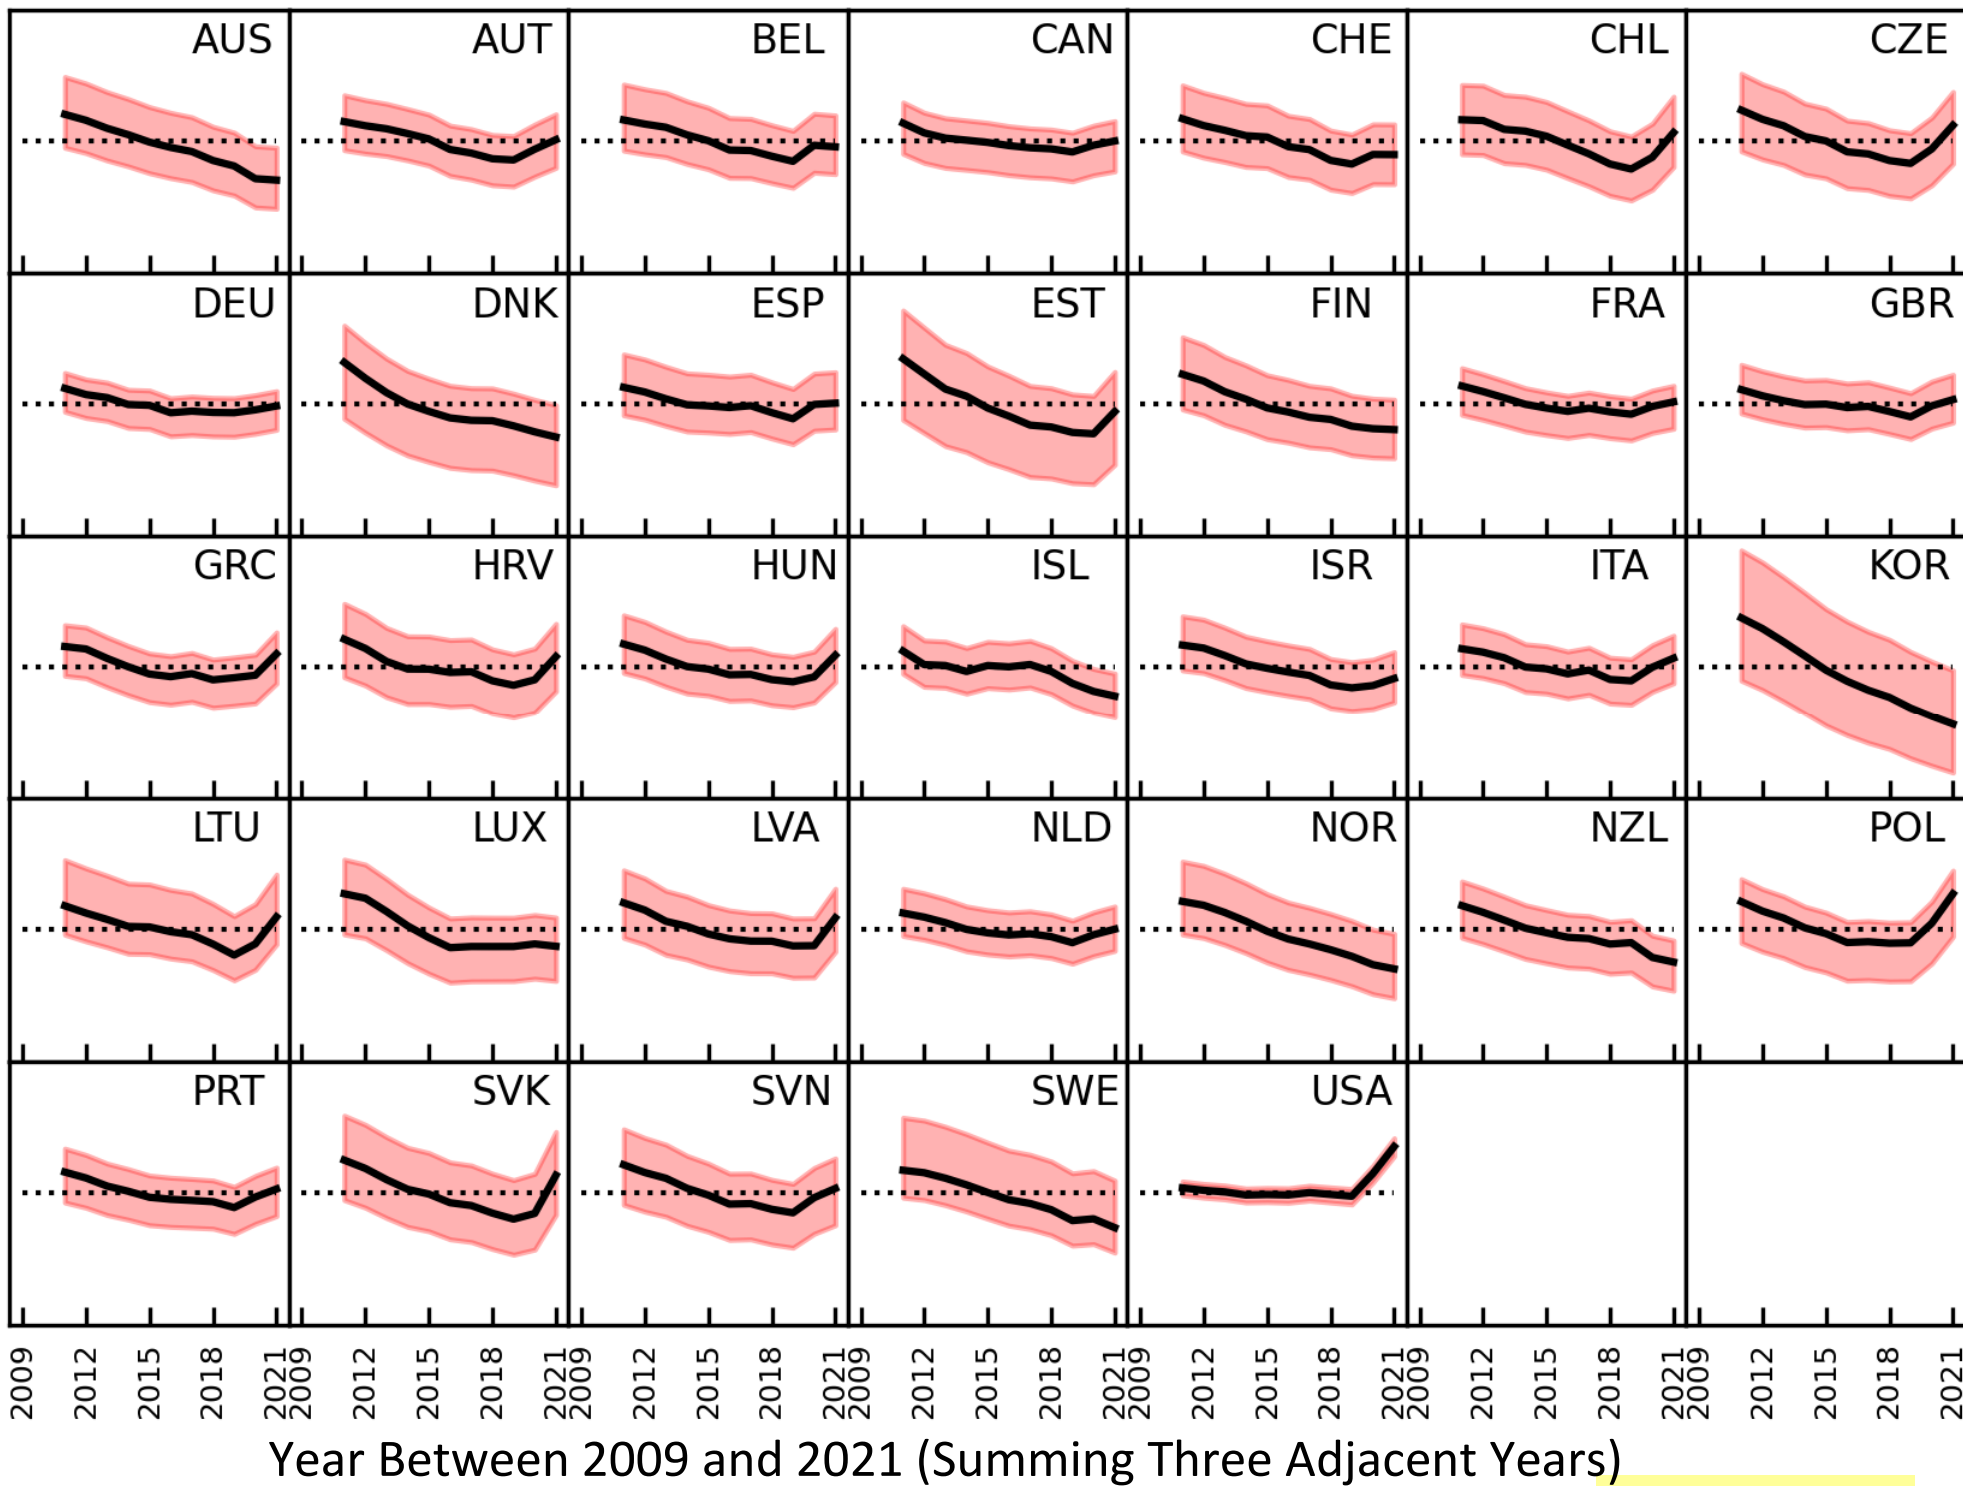

Figure S2B

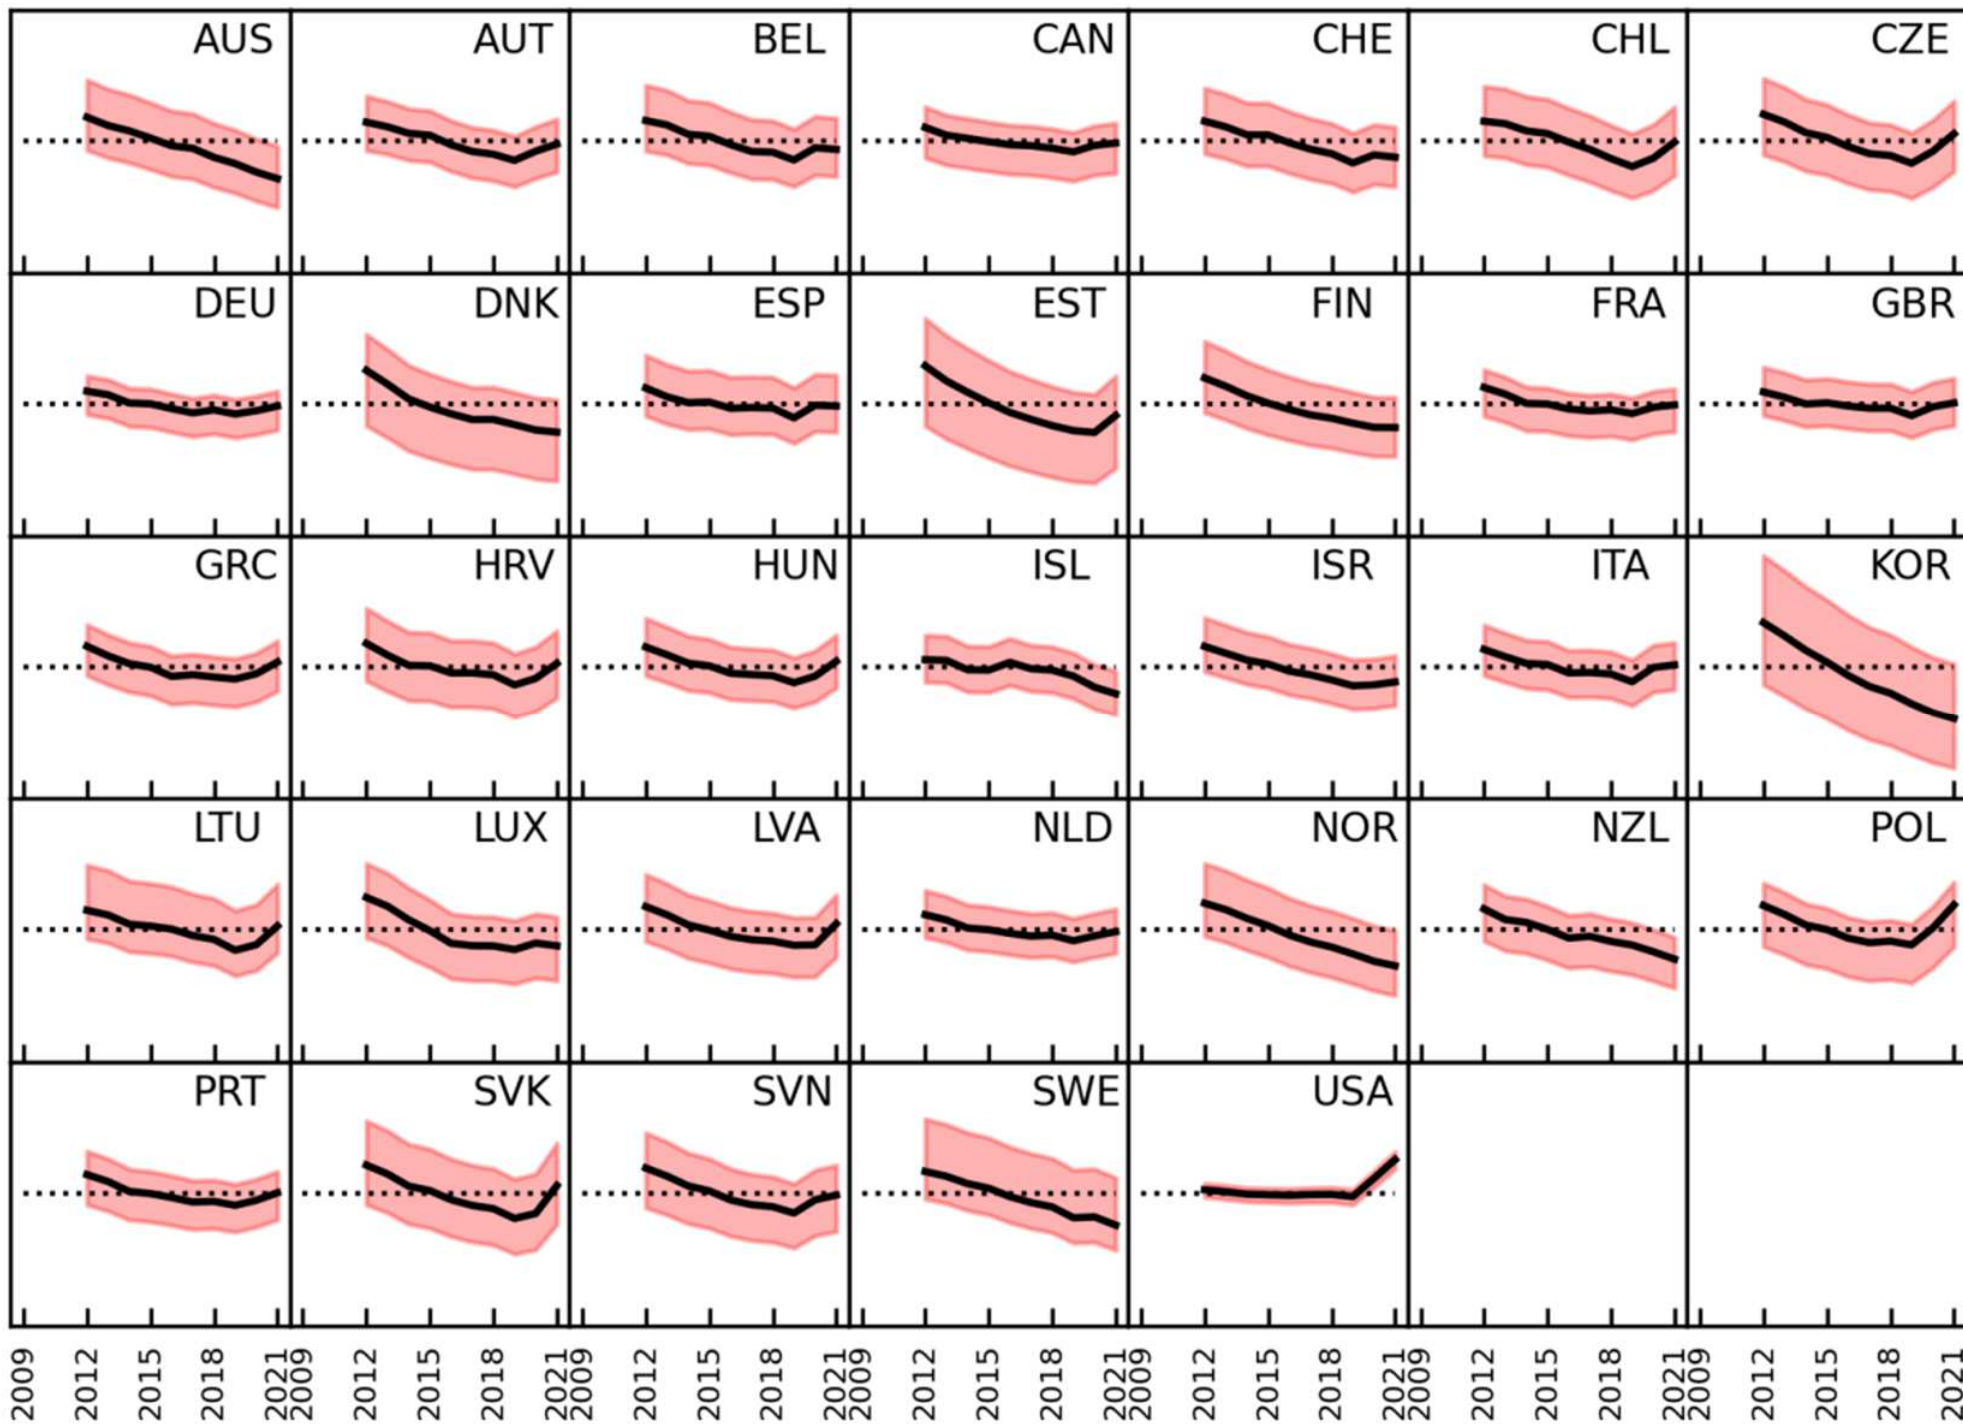

Year Between 2009 and 2021 (Summing Four Adjacent Years)

Figure S2C

medRxiv preprint doi: <https://doi.org/10.1101/2022.09.21.22280219>; this version posted September 23, 2022. The copyright holder for this preprint (which was not certified by peer review) is the author/funder, who has granted medRxiv a license to display the preprint in perpetuity. It is made available under a [CC-BY 4.0 International license](https://creativecommons.org/licenses/by/4.0/).

| Location                                  | LOC | Death File Name                  | Last Modification Date | Population File Name             | Last Modification Date | Death Download Link                                                                                                                                           | Population Download Link |
|-------------------------------------------|-----|----------------------------------|------------------------|----------------------------------|------------------------|---------------------------------------------------------------------------------------------------------------------------------------------------------------|--------------------------|
| All HMD Short Term Mortality Fluctuations |     | stmf.csv                         | 20-May-2022            | stmf.csv                         | 20-May-2022            | <a href="https://www.mortality.org/File/GetDocument/Public/STMF/Outputs/stmf.csv">https://www.mortality.org/File/GetDocument/Public/STMF/Outputs/stmf.csv</a> |                          |
| Australia                                 | AUS | Australia_Deaths_1x1.txt         | 22-Mar-2022            | Australia_Population.txt         | 22-Mar-2022            | AUS.Deaths_1x1.txt                                                                                                                                            | AUS.Population.txt       |
| Austria                                   | AUT | Austria_Deaths_1x1.txt           | 30-Mar-2021            | Austria_Population.txt           | 30-Mar-2021            | AUT.Deaths_1x1.txt                                                                                                                                            | AUT.Population.txt       |
| Belgium                                   | BEL | Belgium_Deaths_1x1.txt           | 25-Sep-2021            | Belgium_Population.txt           | 25-Sep-2021            | BEL.Deaths_1x1.txt                                                                                                                                            | BEL.Population.txt       |
| Canada                                    | CAN | Canada_Deaths_1x1.txt            | 28-Sep-2021            | Canada_Population.txt            | 28-Sep-2021            | CAN.Deaths_1x1.txt                                                                                                                                            | CAN.Population.txt       |
| Switzerland                               | CHE | Switzerland_Deaths_1x1.txt       | 28-Oct-2021            | Switzerland_Population.txt       | 28-Oct-2021            | CHE.Deaths_1x1.txt                                                                                                                                            | CHE.Population.txt       |
| Chile                                     | CHL | Chile_Deaths_1x1.txt             | 18-Apr-2022            | Chile_Population.txt             | 18-Apr-2022            | CHL.Deaths_1x1.txt                                                                                                                                            | CHL.Population.txt       |
| Czechia                                   | CZE | Czechia_Deaths_1x1.txt           | 23-May-2021            | Czechia_Population.txt           | 23-May-2021            | CZE.Deaths_1x1.txt                                                                                                                                            | CZE.Population.txt       |
| Germany                                   | DEU | Germany_Deaths_1x1.txt           | 17-Dec-2018            | Germany_Population.txt           | 17-Dec-2018            | DEUTNP.Deaths_1x1.txt                                                                                                                                         | DEUTNP.Population.txt    |
| Denmark                                   | DNK | Denmark_Deaths_1x1.txt           | 22-Mar-2022            | Denmark_Population.txt           | 22-Mar-2022            | DNK.Deaths_1x1.txt                                                                                                                                            | DNK.Population.txt       |
| Spain                                     | ESP | Spain_Deaths_1x1.txt             | 23-Feb-2022            | Spain_Population.txt             | 23-Feb-2022            | ESP.Deaths_1x1.txt                                                                                                                                            | ESP.Population.txt       |
| Estonia                                   | EST | Estonia_Deaths_1x1.txt           | 21-Jan-2021            | Estonia_Population.txt           | 21-Jan-2021            | EST.Deaths_1x1.txt                                                                                                                                            | EST.Population.txt       |
| Finland                                   | FIN | Finland_Deaths_1x1.txt           | 02-Aug-2021            | Finland_Population.txt           | 02-Aug-2021            | FIN.Deaths_1x1.txt                                                                                                                                            | FIN.Population.txt       |
| France                                    | FRA | France_Deaths_1x1.txt            | 11-Apr-2022            | France_Population.txt            | 11-Apr-2022            | FRATNP.Deaths_1x1.txt                                                                                                                                         | FRATNP.Population.txt    |
| United Kingdom                            | GBR | UK_Deaths_1x1.txt                | 11-Jul-2020            | UK_Population.txt                | 11-Jul-2020            | GBR_NP.Deaths_1x1.txt                                                                                                                                         | GBR_NP.Population.txt    |
| Greece                                    | GRC | Greece_Deaths_1x1.txt            | 08-Nov-2021            | Greece_Population.txt            | 08-Nov-2021            | GRC.Deaths_1x1.txt                                                                                                                                            | GRC.Population.txt       |
| Croatia                                   | HRV | Croatia_Deaths_1x1.txt           | 24-Feb-2022            | Croatia_Population.txt           | 24-Feb-2022            | HRV.Deaths_1x1.txt                                                                                                                                            | HRV.Population.txt       |
| Hungary                                   | HUN | Hungary_Deaths_1x1.txt           | 30-Nov-2021            | Hungary_Population.txt           | 30-Nov-2021            | HUN.Deaths_1x1.txt                                                                                                                                            | HUN.Population.txt       |
| Iceland                                   | ISL | Iceland_Deaths_1x1.txt           | 02-Apr-2020            | Iceland_Population.txt           | 02-Apr-2020            | ISL.Deaths_1x1.txt                                                                                                                                            | ISL.Population.txt       |
| Israel                                    | ISR | Israel_Deaths_1x1.txt            | 31-Oct-2018            | Israel_Population.txt            | 31-Oct-2018            | ISR.Deaths_1x1.txt                                                                                                                                            | ISR.Population.txt       |
| Italy                                     | ITA | Italy_Deaths_1x1.txt             | 11-Apr-2022            | Italy_Population.txt             | 11-Apr-2022            | ITA.Deaths_1x1.txt                                                                                                                                            | ITA.Population.txt       |
| South Korea                               | KOR | Republic_of_Korea_Deaths_1x1.txt | 15-Nov-2019            | Republic_of_Korea_Population.txt | 15-Nov-2019            | KOR.Deaths_1x1.txt                                                                                                                                            | KOR.Population.txt       |
| Lithuania                                 | LTU | Lithuania_Deaths_1x1.txt         | 29-Jan-2022            | Lithuania_Population.txt         | 29-Jan-2022            | LTU.Deaths_1x1.txt                                                                                                                                            | LTU.Population.txt       |
| Luxembourg                                | LUX | Luxembourg_Deaths_1x1.txt        | 21-Jan-2022            | Luxembourg_Population.txt        | 21-Jan-2022            | LUX.Deaths_1x1.txt                                                                                                                                            | LUX.Population.txt       |
| Latvia                                    | LVA | Latvia_Deaths_1x1.txt            | 11-Mar-2021            | Latvia_Population.txt            | 11-Mar-2021            | LVA.Deaths_1x1.txt                                                                                                                                            | LVA.Population.txt       |
| Netherlands                               | NLD | Netherlands_Deaths_1x1.txt       | 31-Mar-2021            | Netherlands_Population.txt       | 31-Mar-2021            | NLD.Deaths_1x1.txt                                                                                                                                            | NLD.Population.txt       |
| Norway                                    | NOR | Norway_Deaths_1x1.txt            | 15-Apr-2021            | Norway_Population.txt            | 15-Apr-2021            | NOR.Deaths_1x1.txt                                                                                                                                            | NOR.Population.txt       |
| New Zealand                               | NZL | New_Zealand_Deaths_1x1.txt       | 26-Sep-2017            | New_Zealand_Population.txt       | 26-Sep-2017            | NZL_NP.Deaths_1x1.txt                                                                                                                                         | NZL_NP.Population.txt    |
| Poland                                    | POL | Poland_Deaths_1x1.txt            | 13-Apr-2021            | Poland_Population.txt            | 13-Apr-2021            | POL.Deaths_1x1.txt                                                                                                                                            | POL.Population.txt       |
| Portugal                                  | PRT | Portugal_Deaths_1x1.txt          | 01-Aug-2021            | Portugal_Population.txt          | 01-Aug-2021            | PRT.Deaths_1x1.txt                                                                                                                                            | PRT.Population.txt       |
| Slovakia                                  | SVK | Slovakia_Deaths_1x1.txt          | 29-Oct-2021            | Slovakia_Population.txt          | 29-Oct-2021            | SVK.Deaths_1x1.txt                                                                                                                                            | SVK.Population.txt       |
| Slovenia                                  | SVN | Slovenia_Deaths_1x1.txt          | 01-Nov-2021            | Slovenia_Population.txt          | 01-Nov-2021            | SVN.Deaths_1x1.txt                                                                                                                                            | SVN.Population.txt       |
| Sweden                                    | SWE | Sweden_Deaths_1x1.txt            | 12-May-2022            | Sweden_Population.txt            | 12-May-2022            | SWE.Deaths_1x1.txt                                                                                                                                            | SWE.Population.txt       |
| United States                             | USA | USA_Deaths_1x1.txt               | 17-Mar-2021            | USA_Population.txt               | 17-Mar-2021            | USA.Deaths_1x1.txt                                                                                                                                            | USA.Population.txt       |

All Deaths\_1x1.txt and Population.txt files are downloaded as a zip file at [https://www.mortality.org/File/Download/hmd.v6/zip/all\\_hmd/hmd\\_statistics\\_20220812.zip](https://www.mortality.org/File/Download/hmd.v6/zip/all_hmd/hmd_statistics_20220812.zip), where the Version shown here is "hmd\_statistics\_20220812" and changes frequently. The relevant files for Deaths and Population are in directories [versions/deaths/Deaths\\_1x1/](https://www.mortality.org/File/Download/hmd.v6/zip/all_hmd/hmd_statistics_20220812.zip/versions/deaths/Deaths_1x1/) and [versions/population/Population/](https://www.mortality.org/File/Download/hmd.v6/zip/all_hmd/hmd_statistics_20220812.zip/versions/population/Population/) respectively. More generally, the download button for the latest version is marked "All HMD Statistics" and is at the bottom of the page linked by <https://www.mortality.org/Data/ZippedDataFiles>
